# Supplementary material for: Genomic profiling of fungal cell wall-interfering compounds: identification of a common gene signature
Source: PubMed Central journal article supplement (PMC4560923; doi:10.1186/s12864-015-1879-4), 2015-09-05

*fks1*Δ and *nha1*Δ

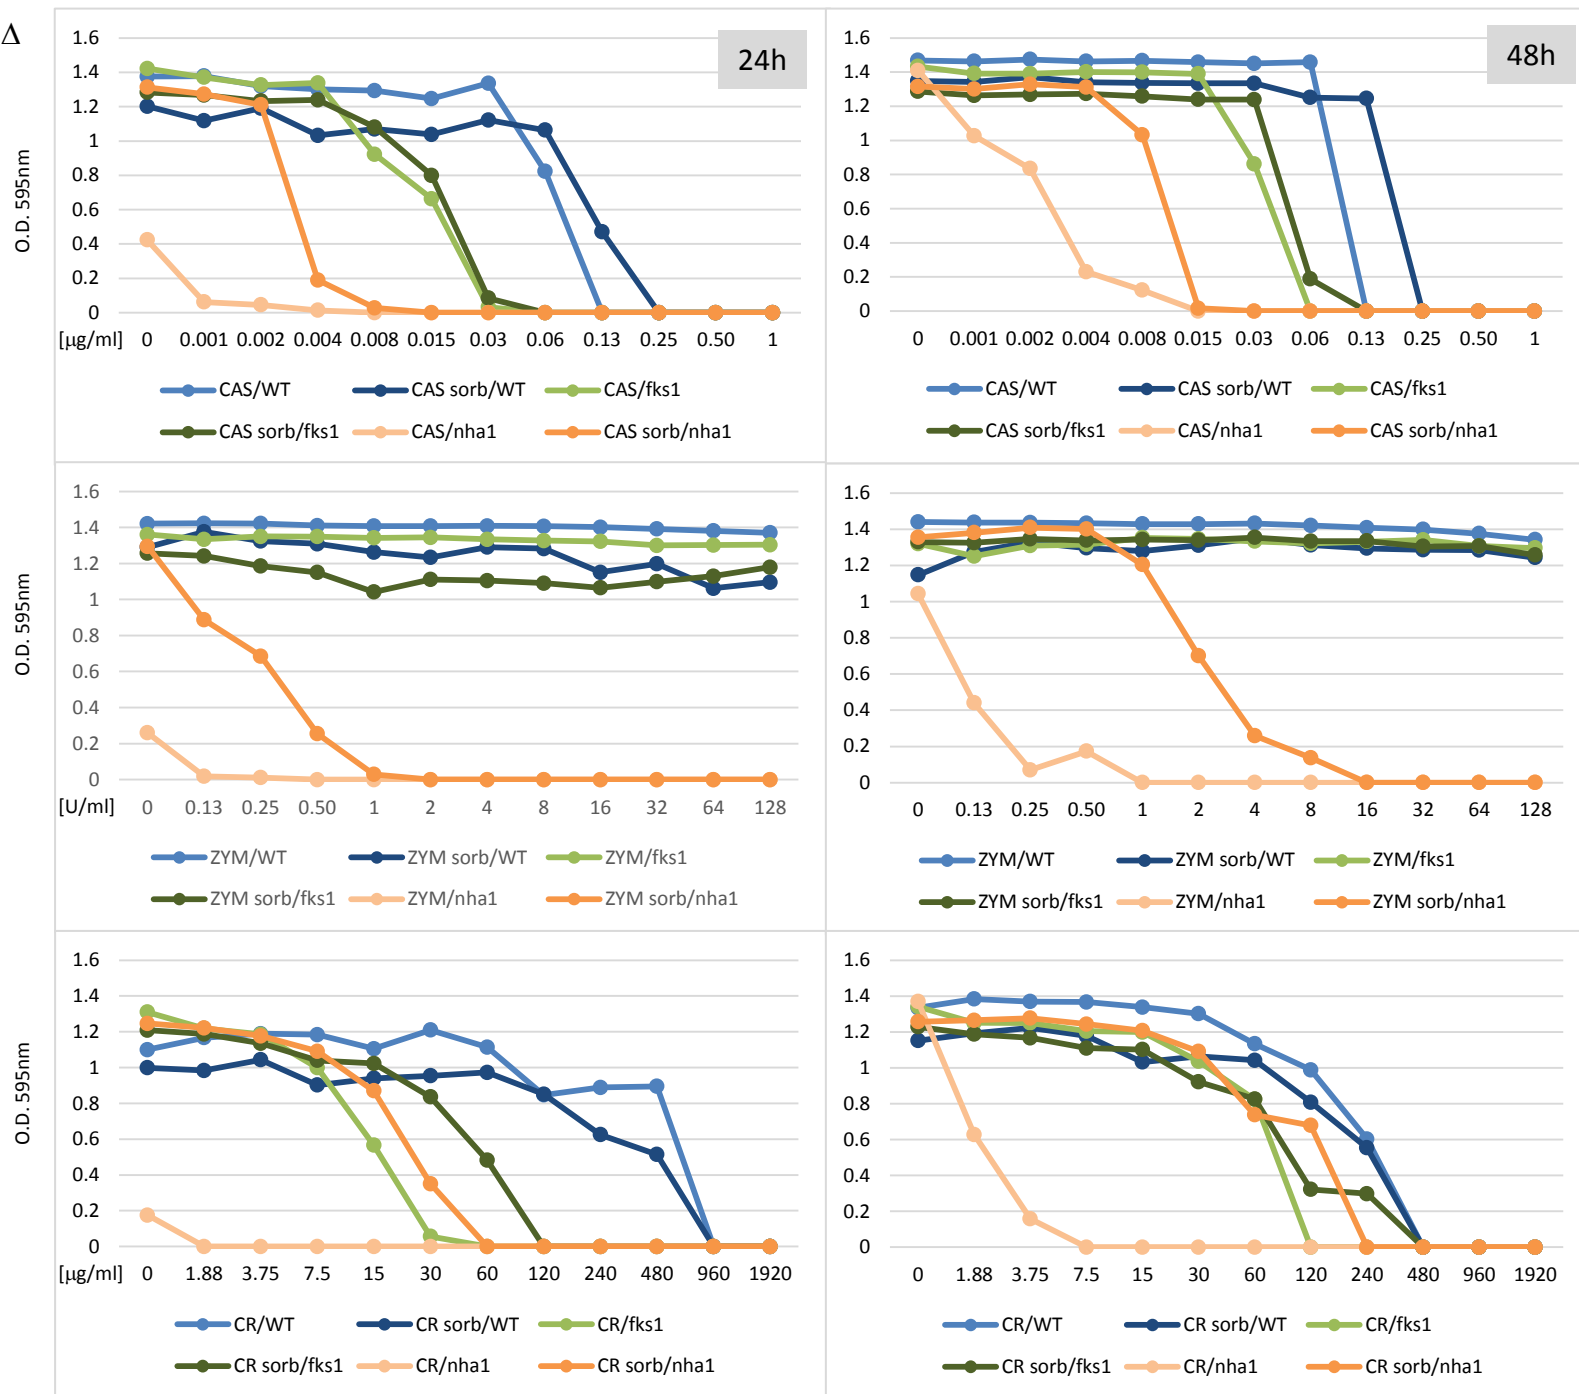

*asc1Δ* and *sto1Δ*

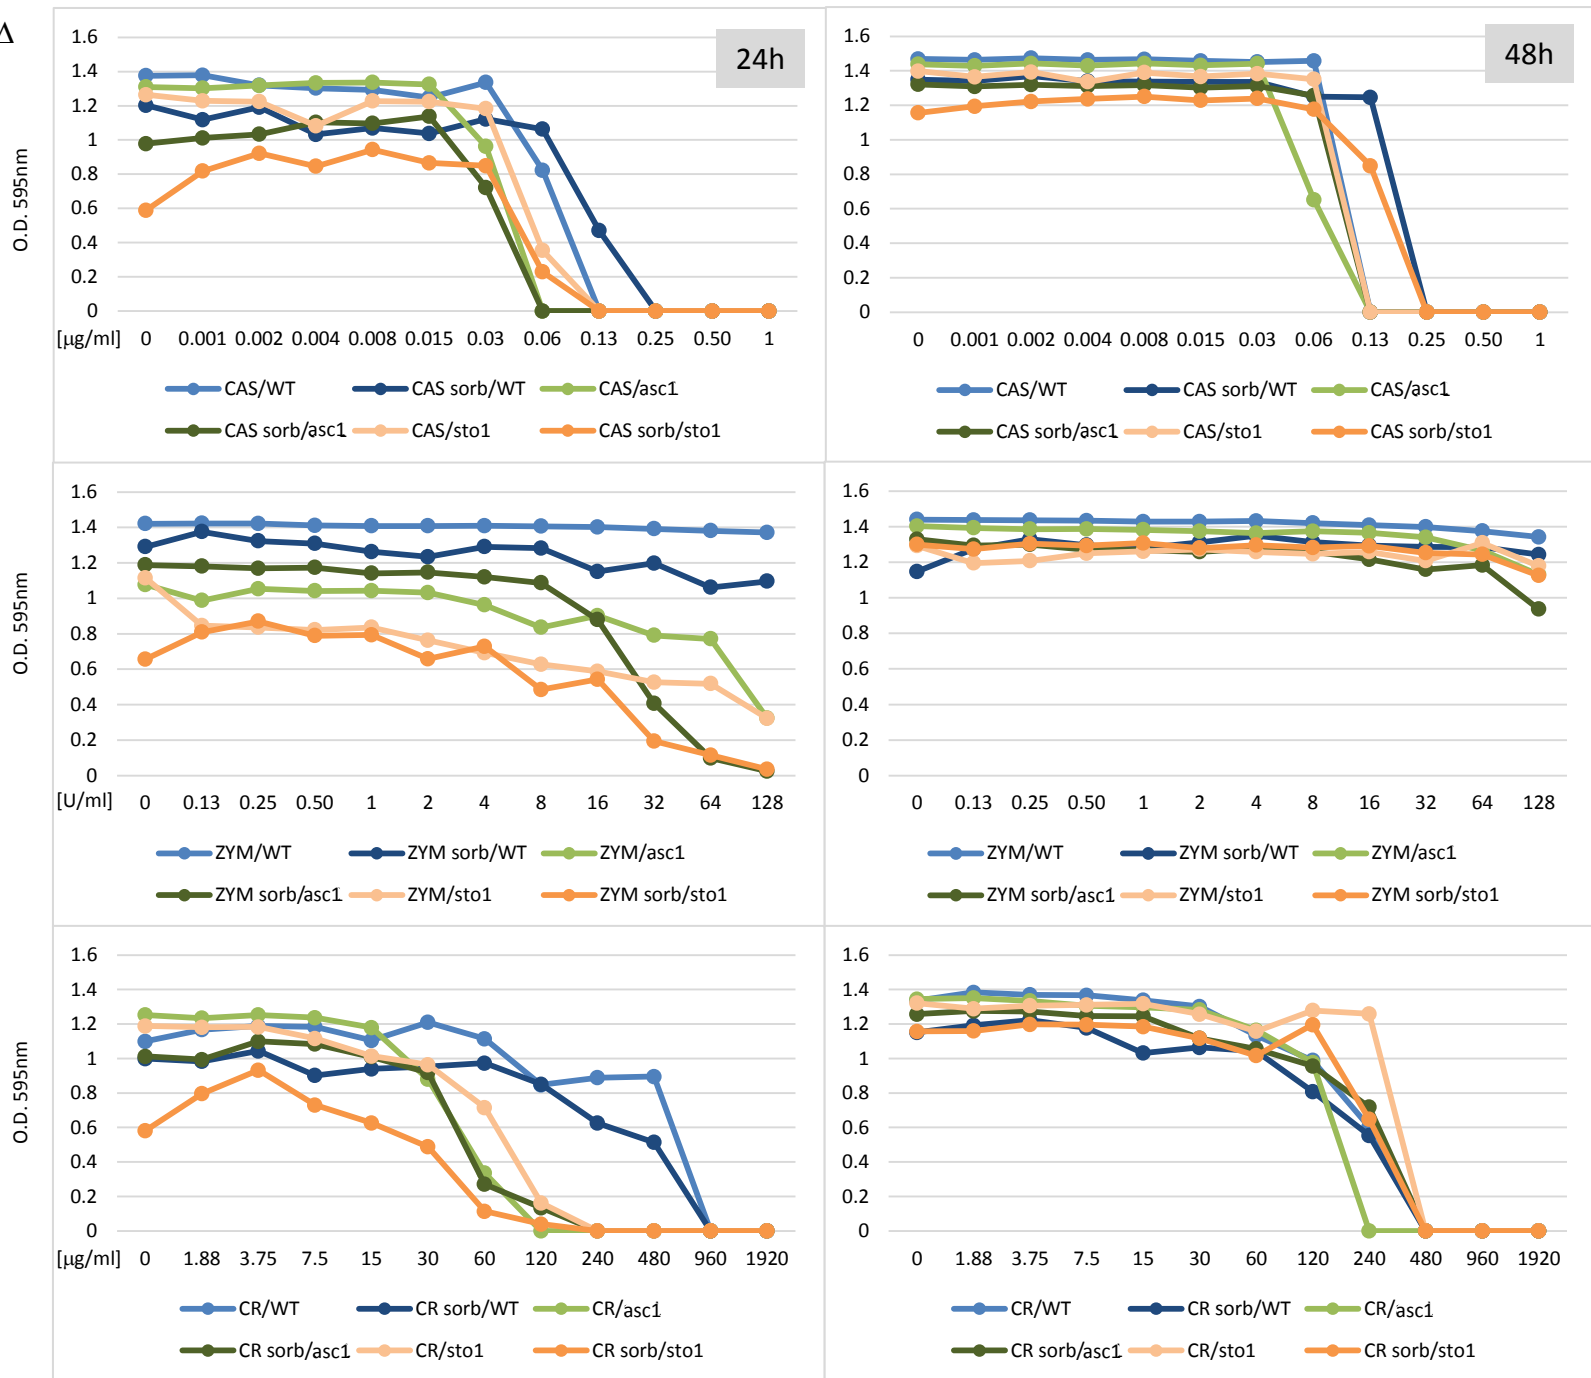

*htl1Δ* and *slt2Δ*

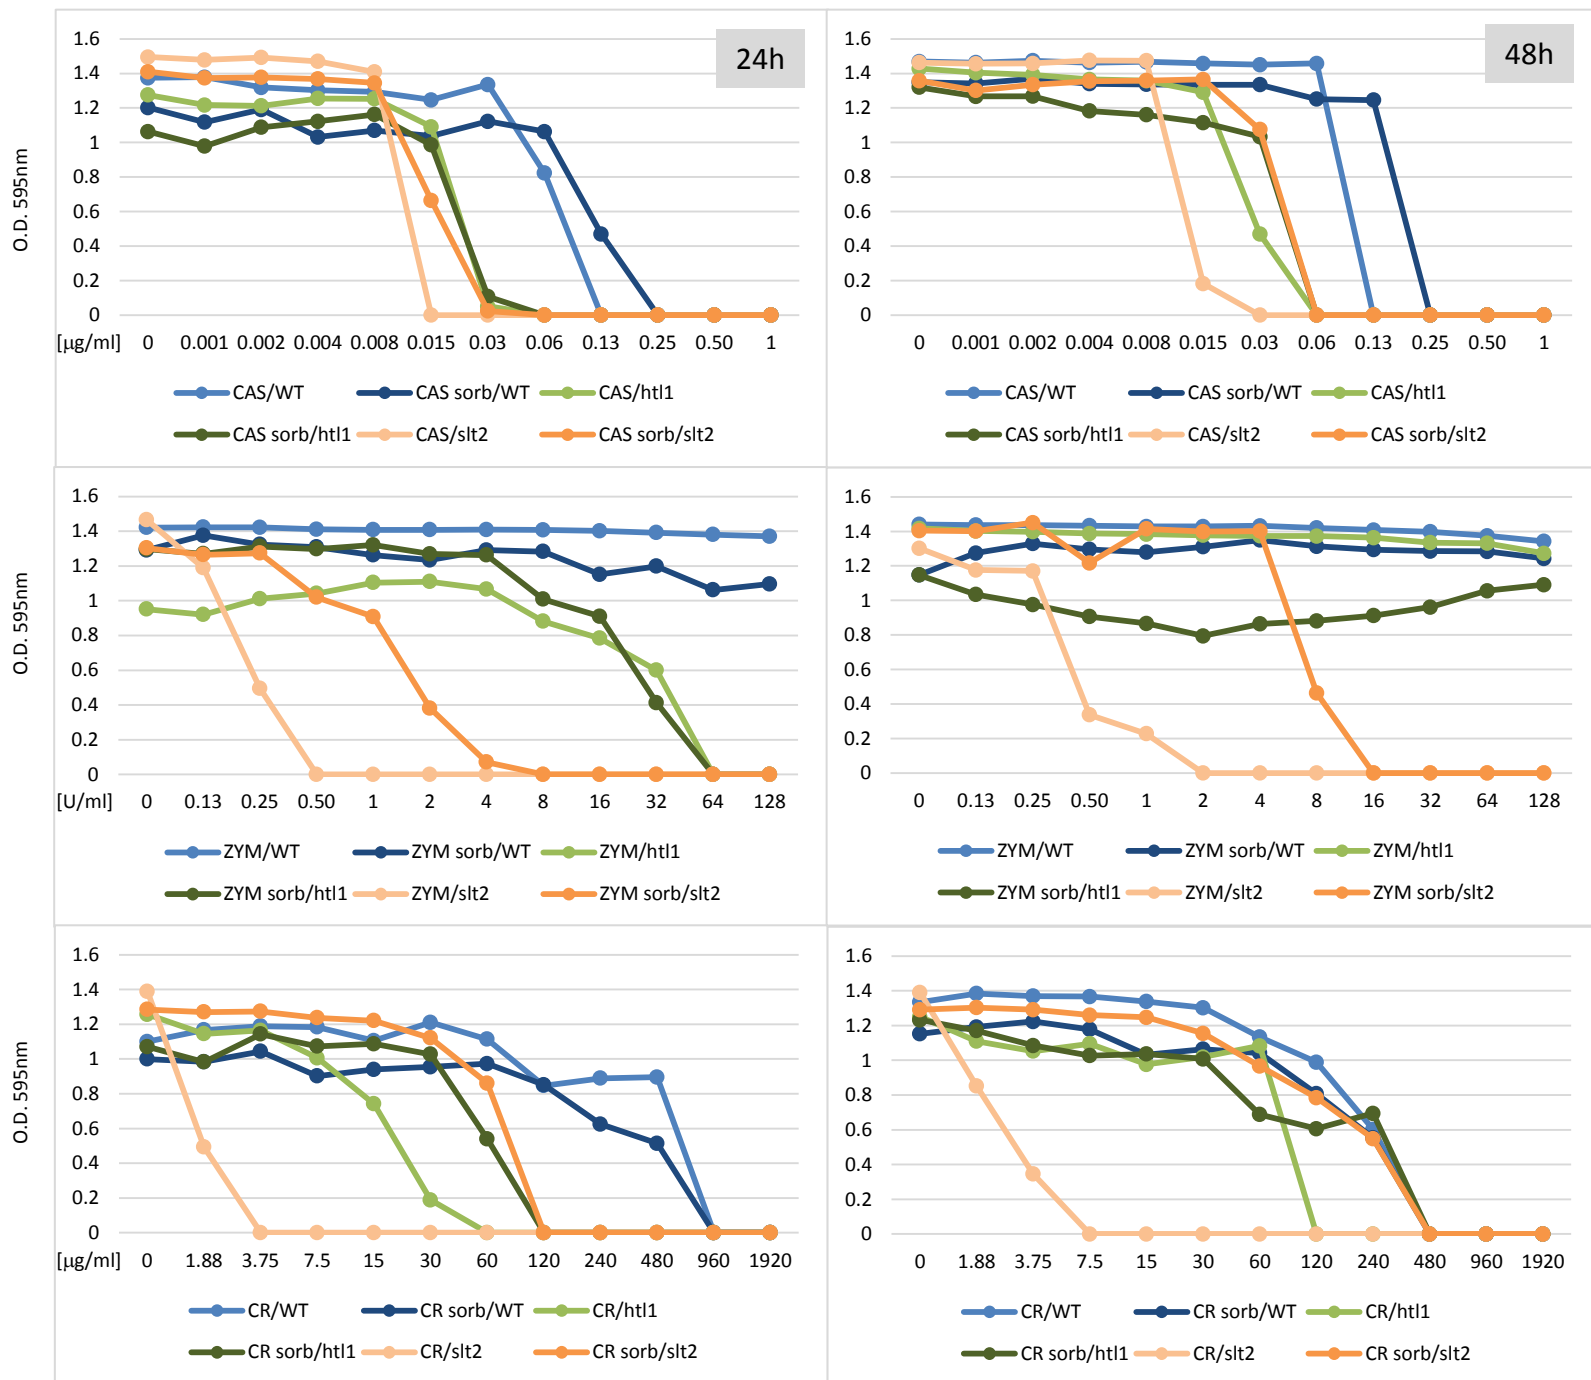

*vma22*Δ and *mnn11*Δ

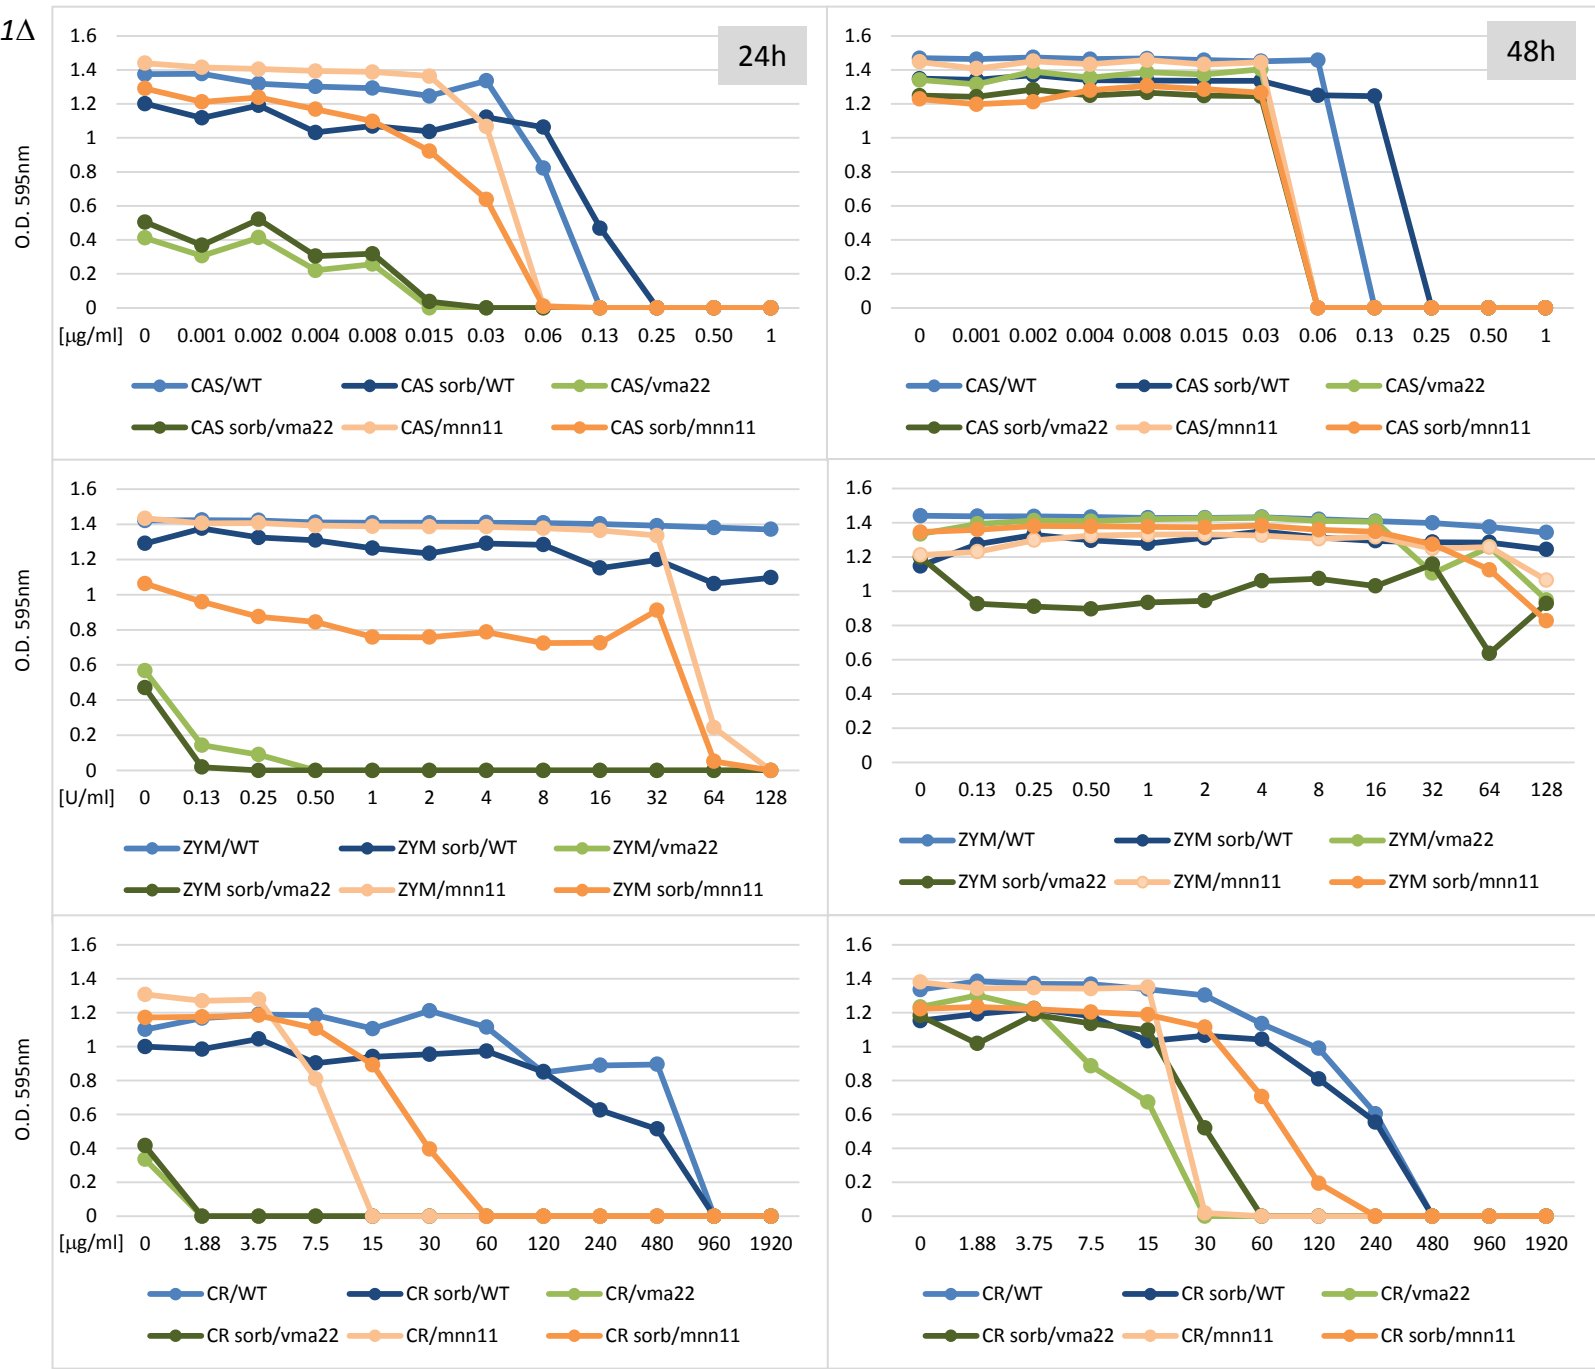

*rcy1* $\Delta$  and *vma21* $\Delta$

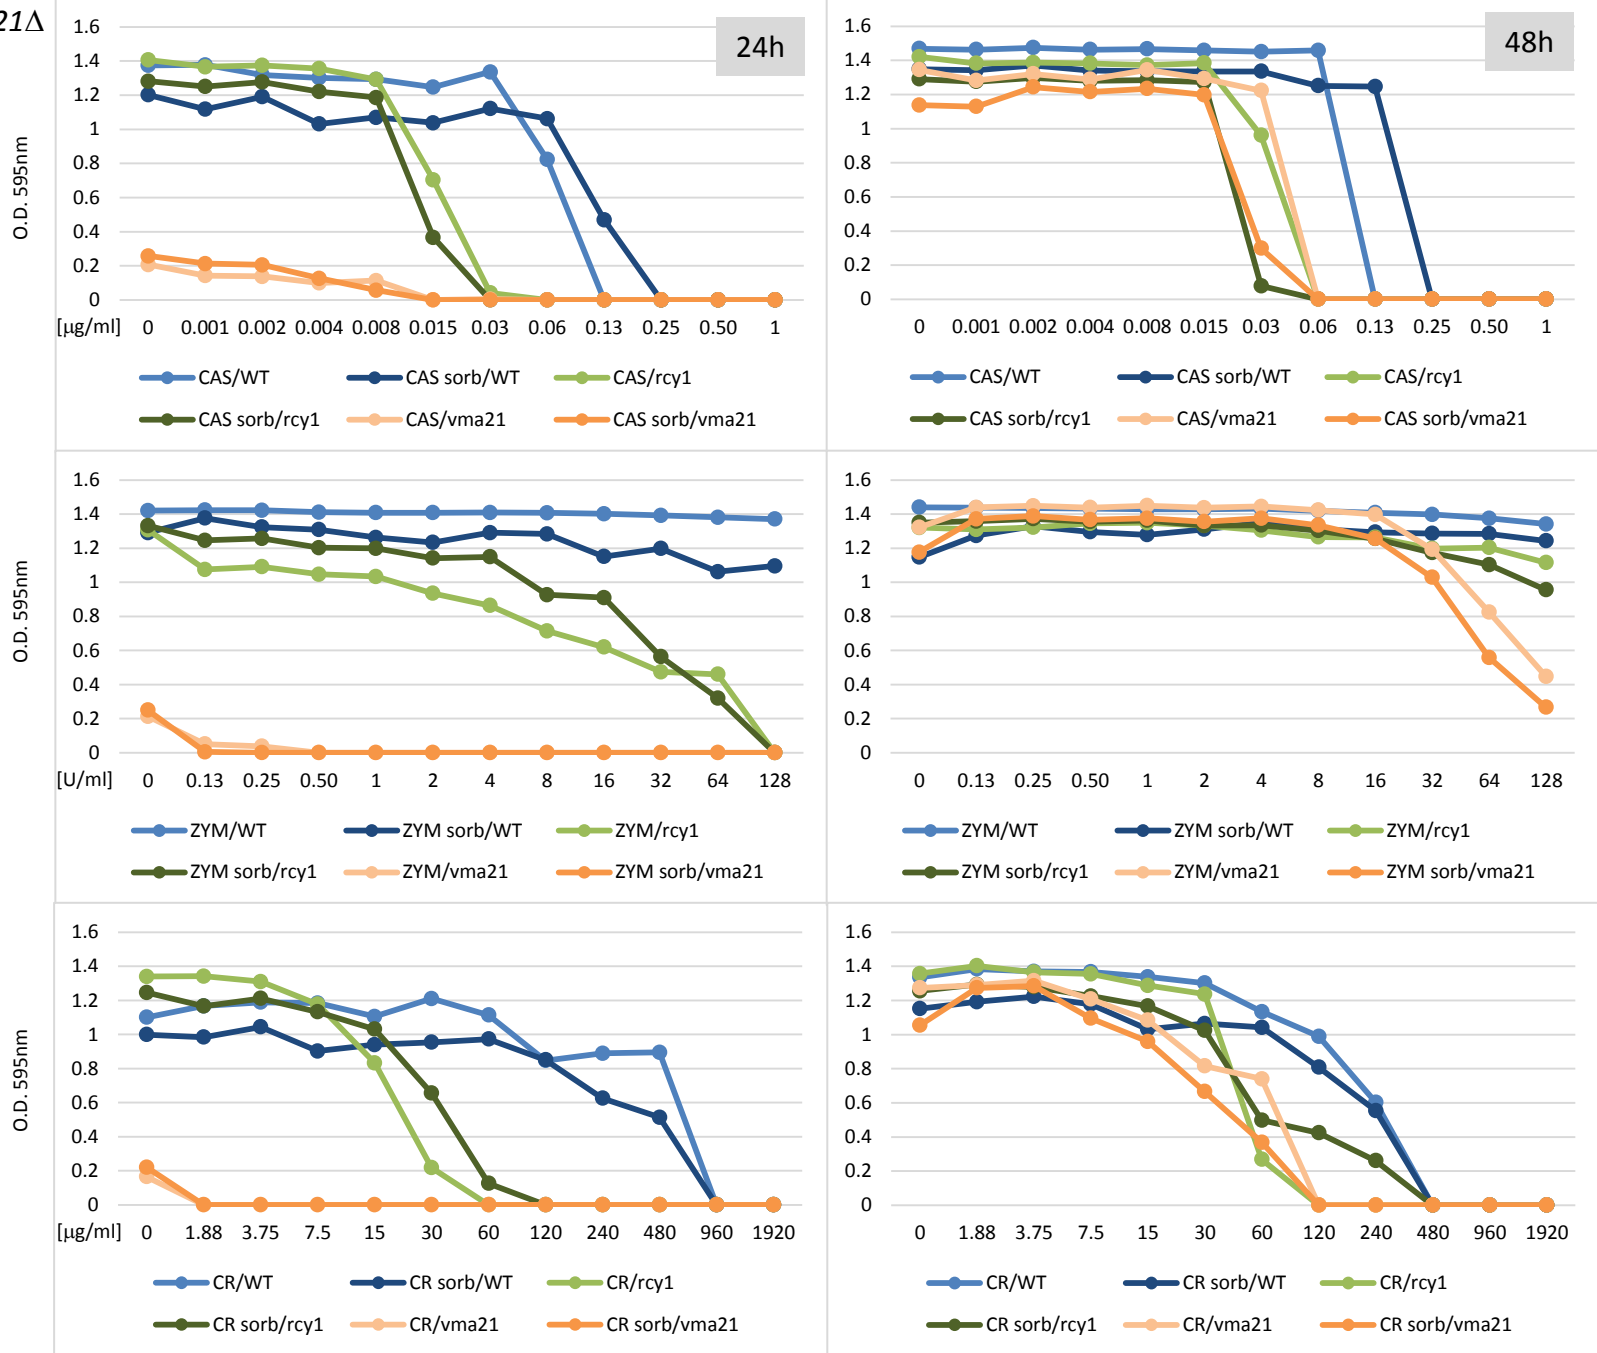

*kem1Δ* and *swi6Δ*

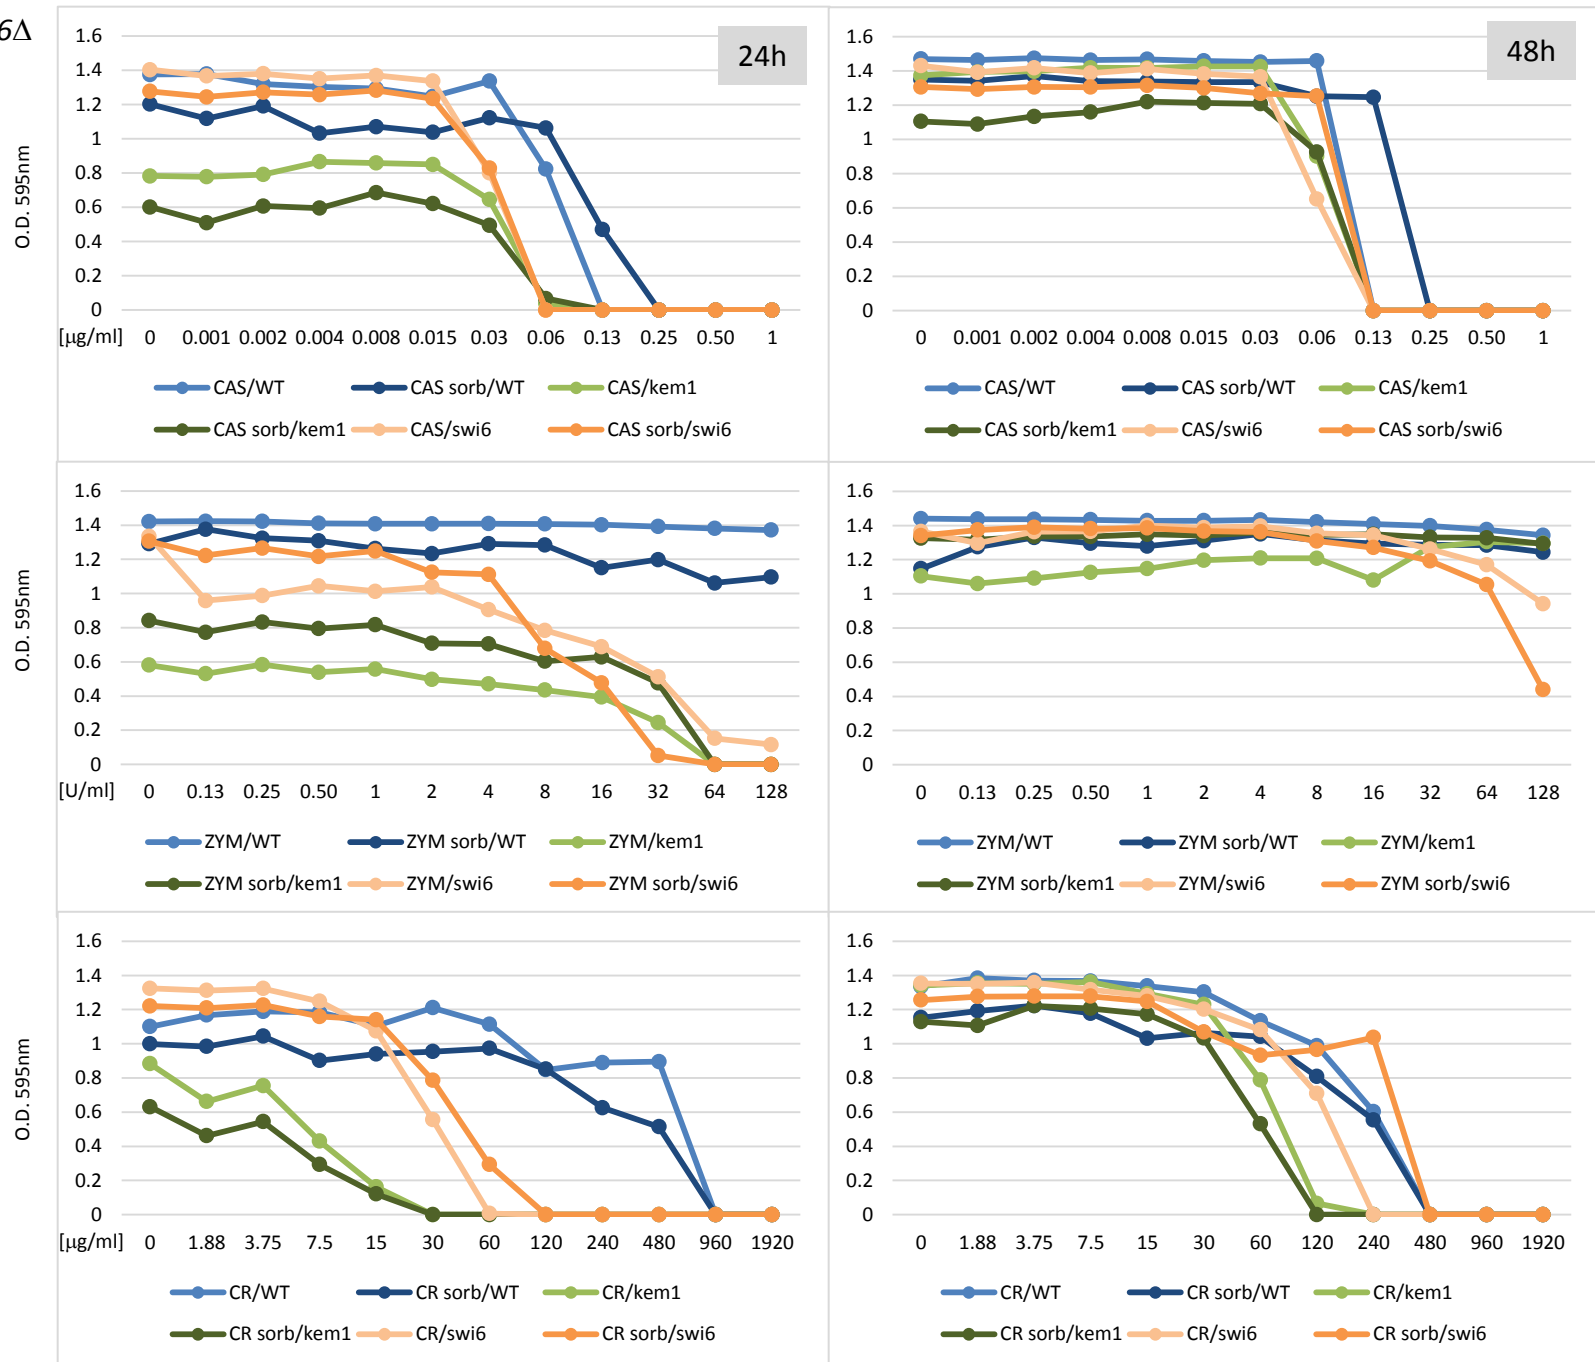

*cax4*Δ and *vma7*Δ

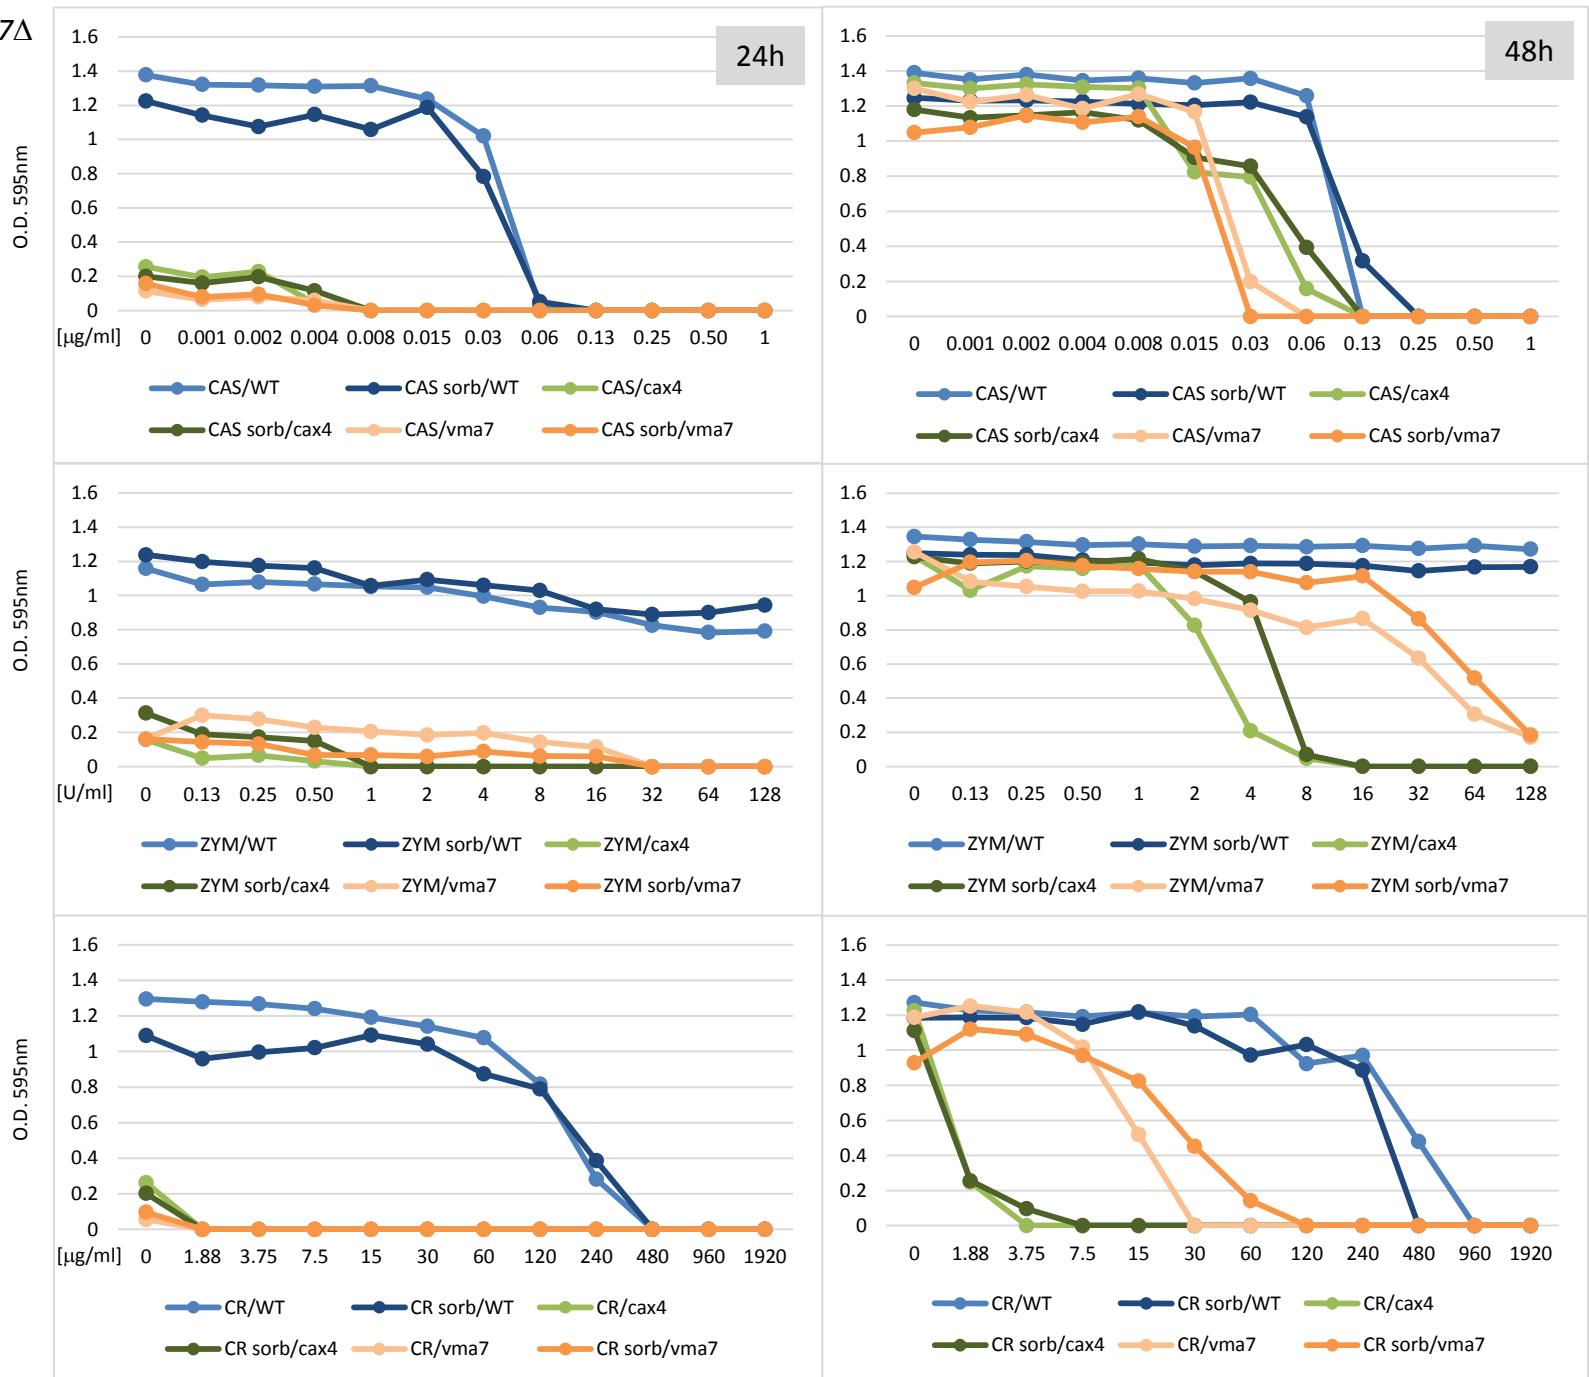





*fps1* $\Delta$  and *def1* $\Delta$

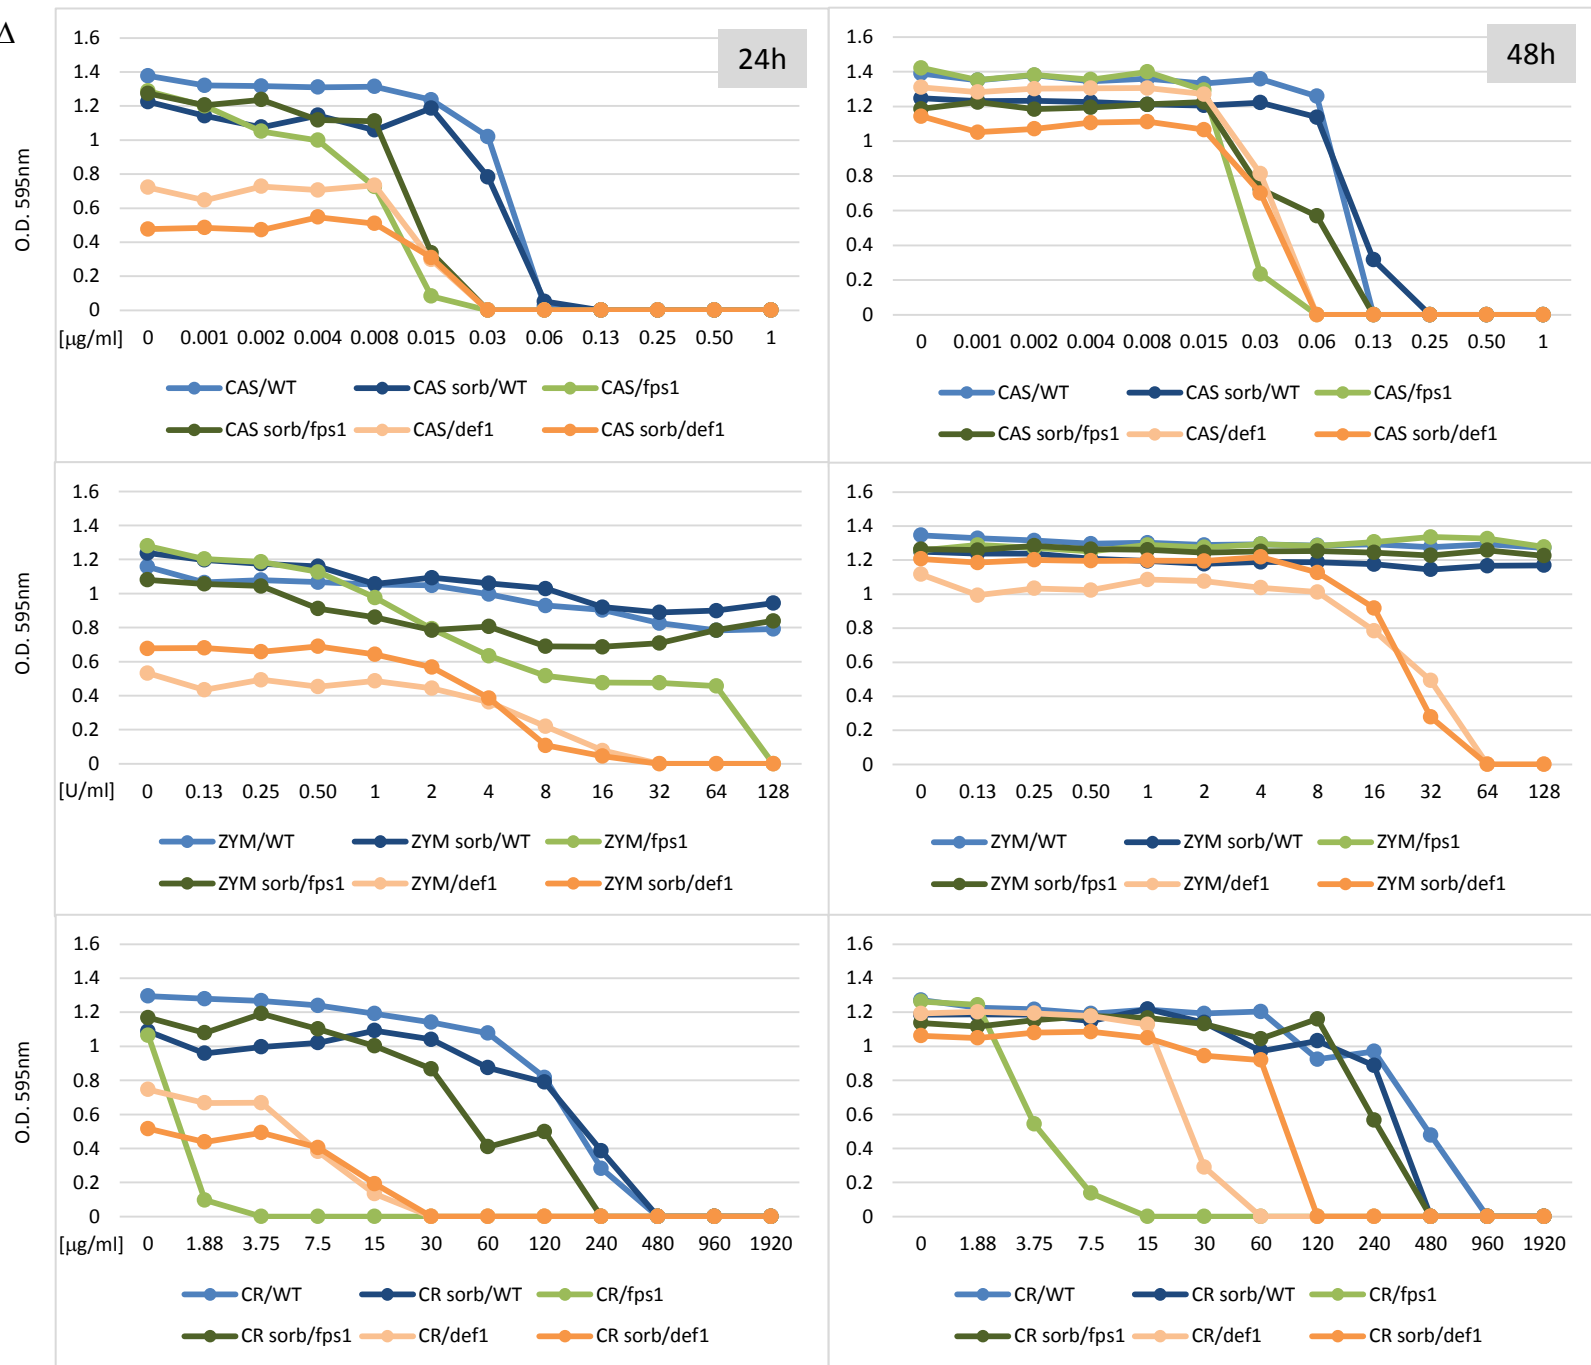

*scp160*Δ and *las21*Δ

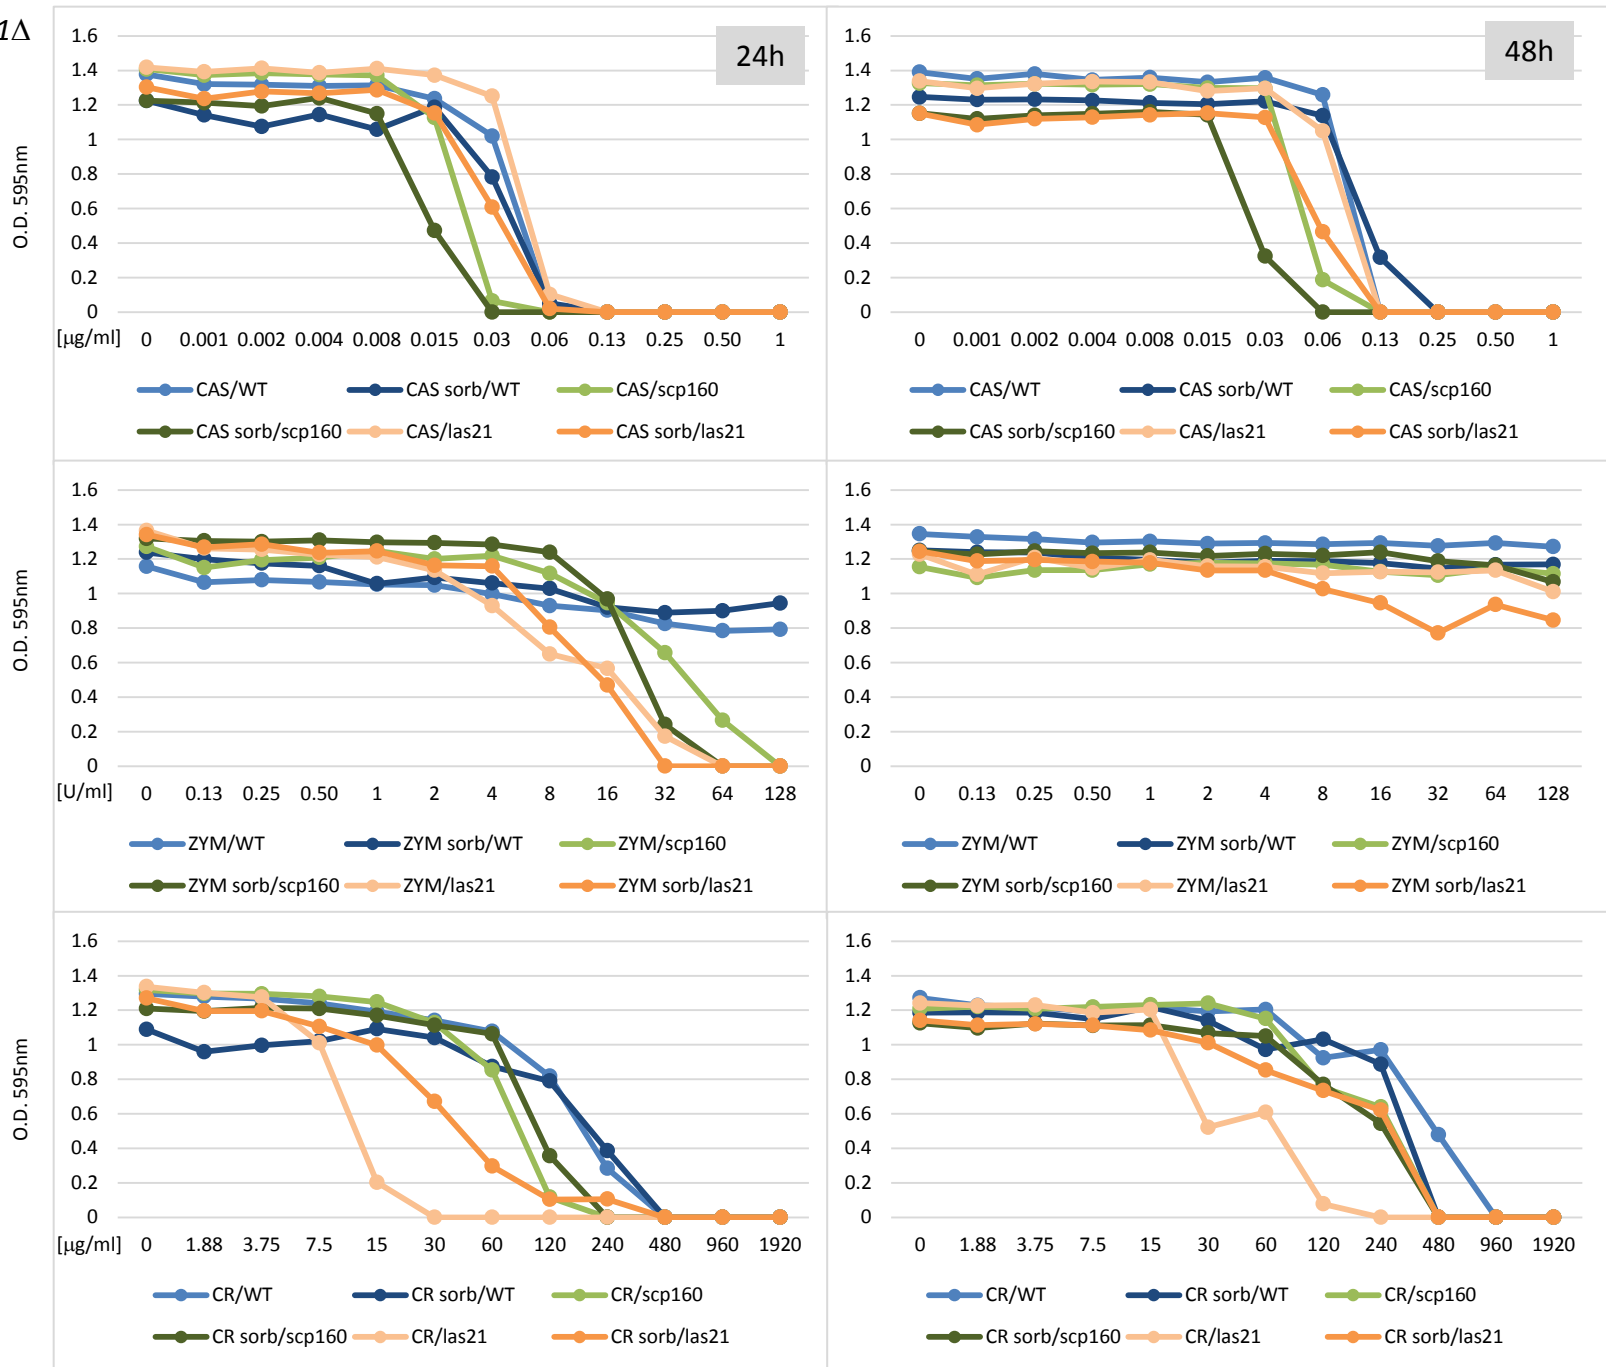

*bck1Δ* and *asf1Δ*

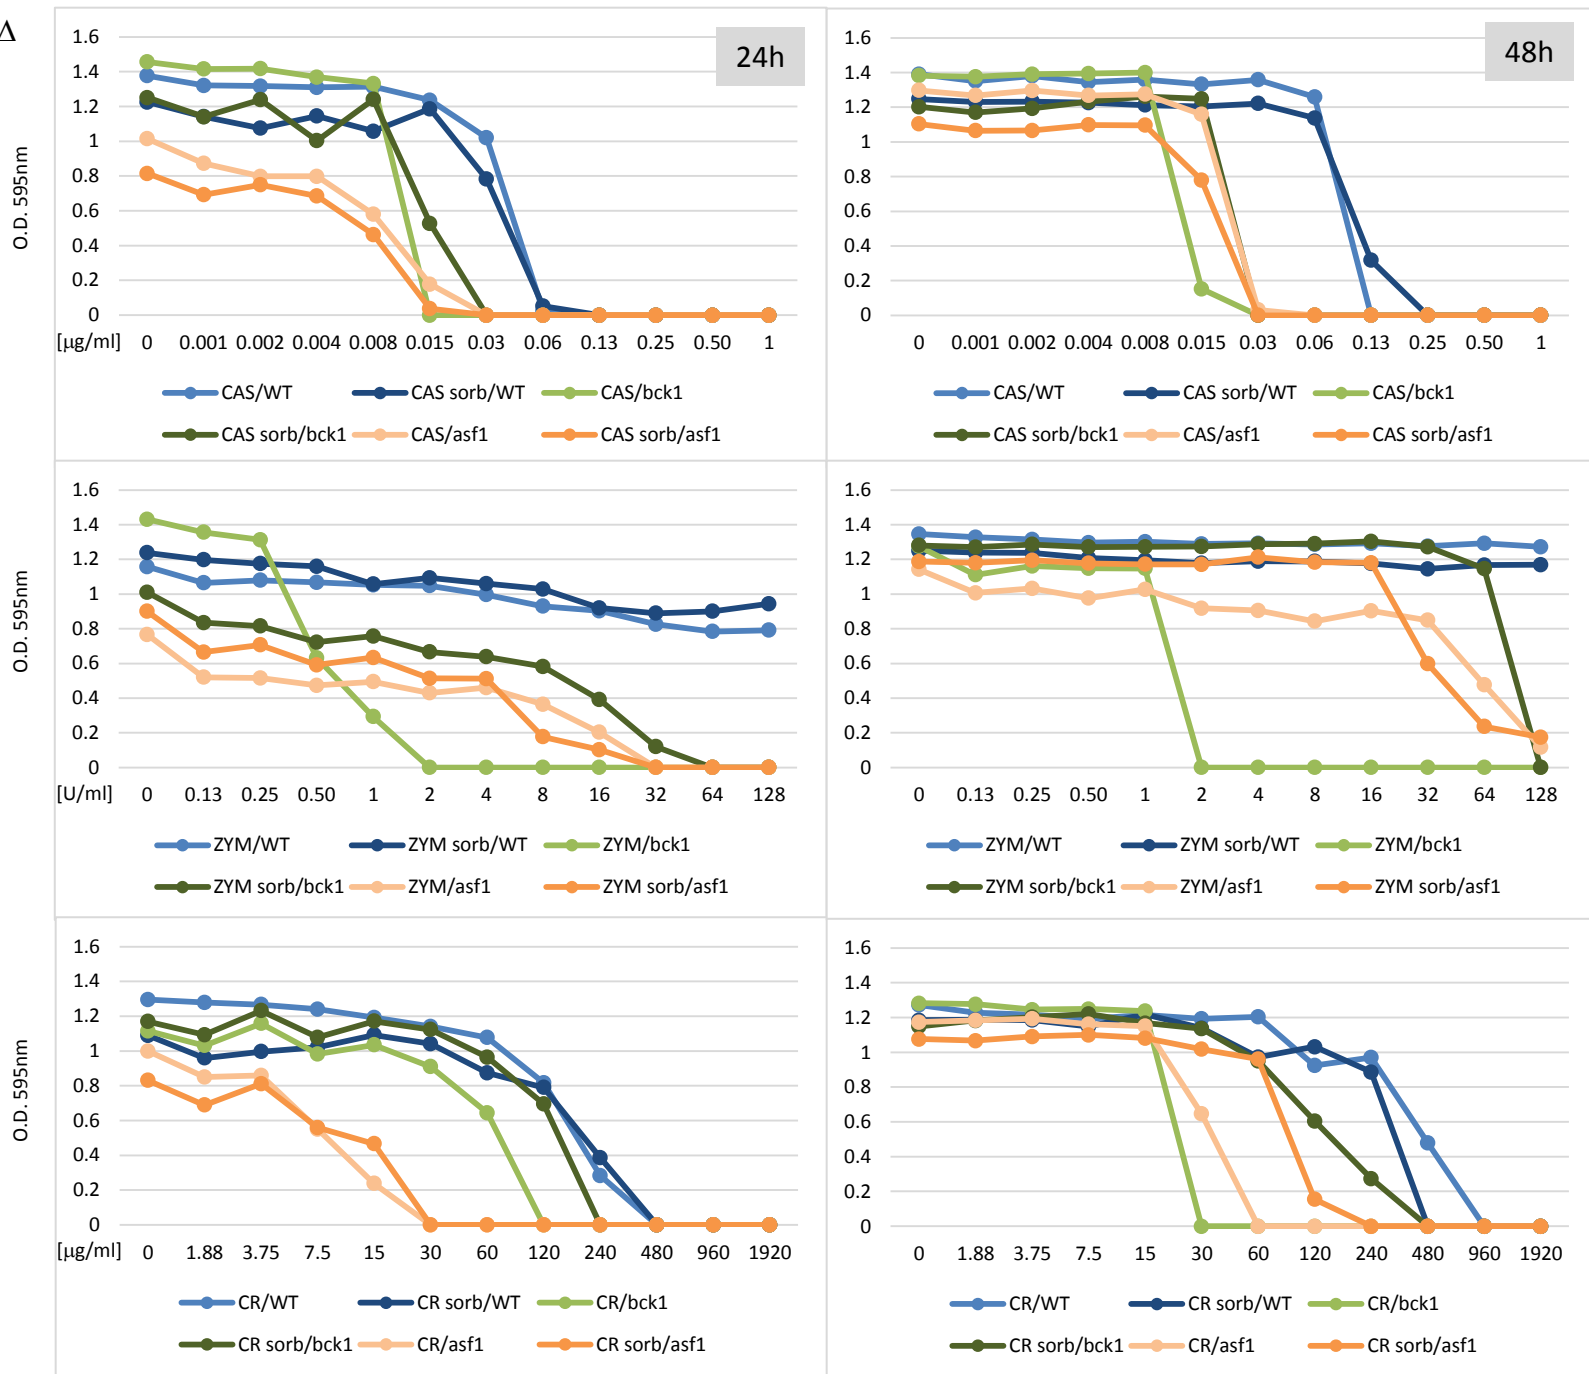

*snf1Δ* and *ies6Δ*

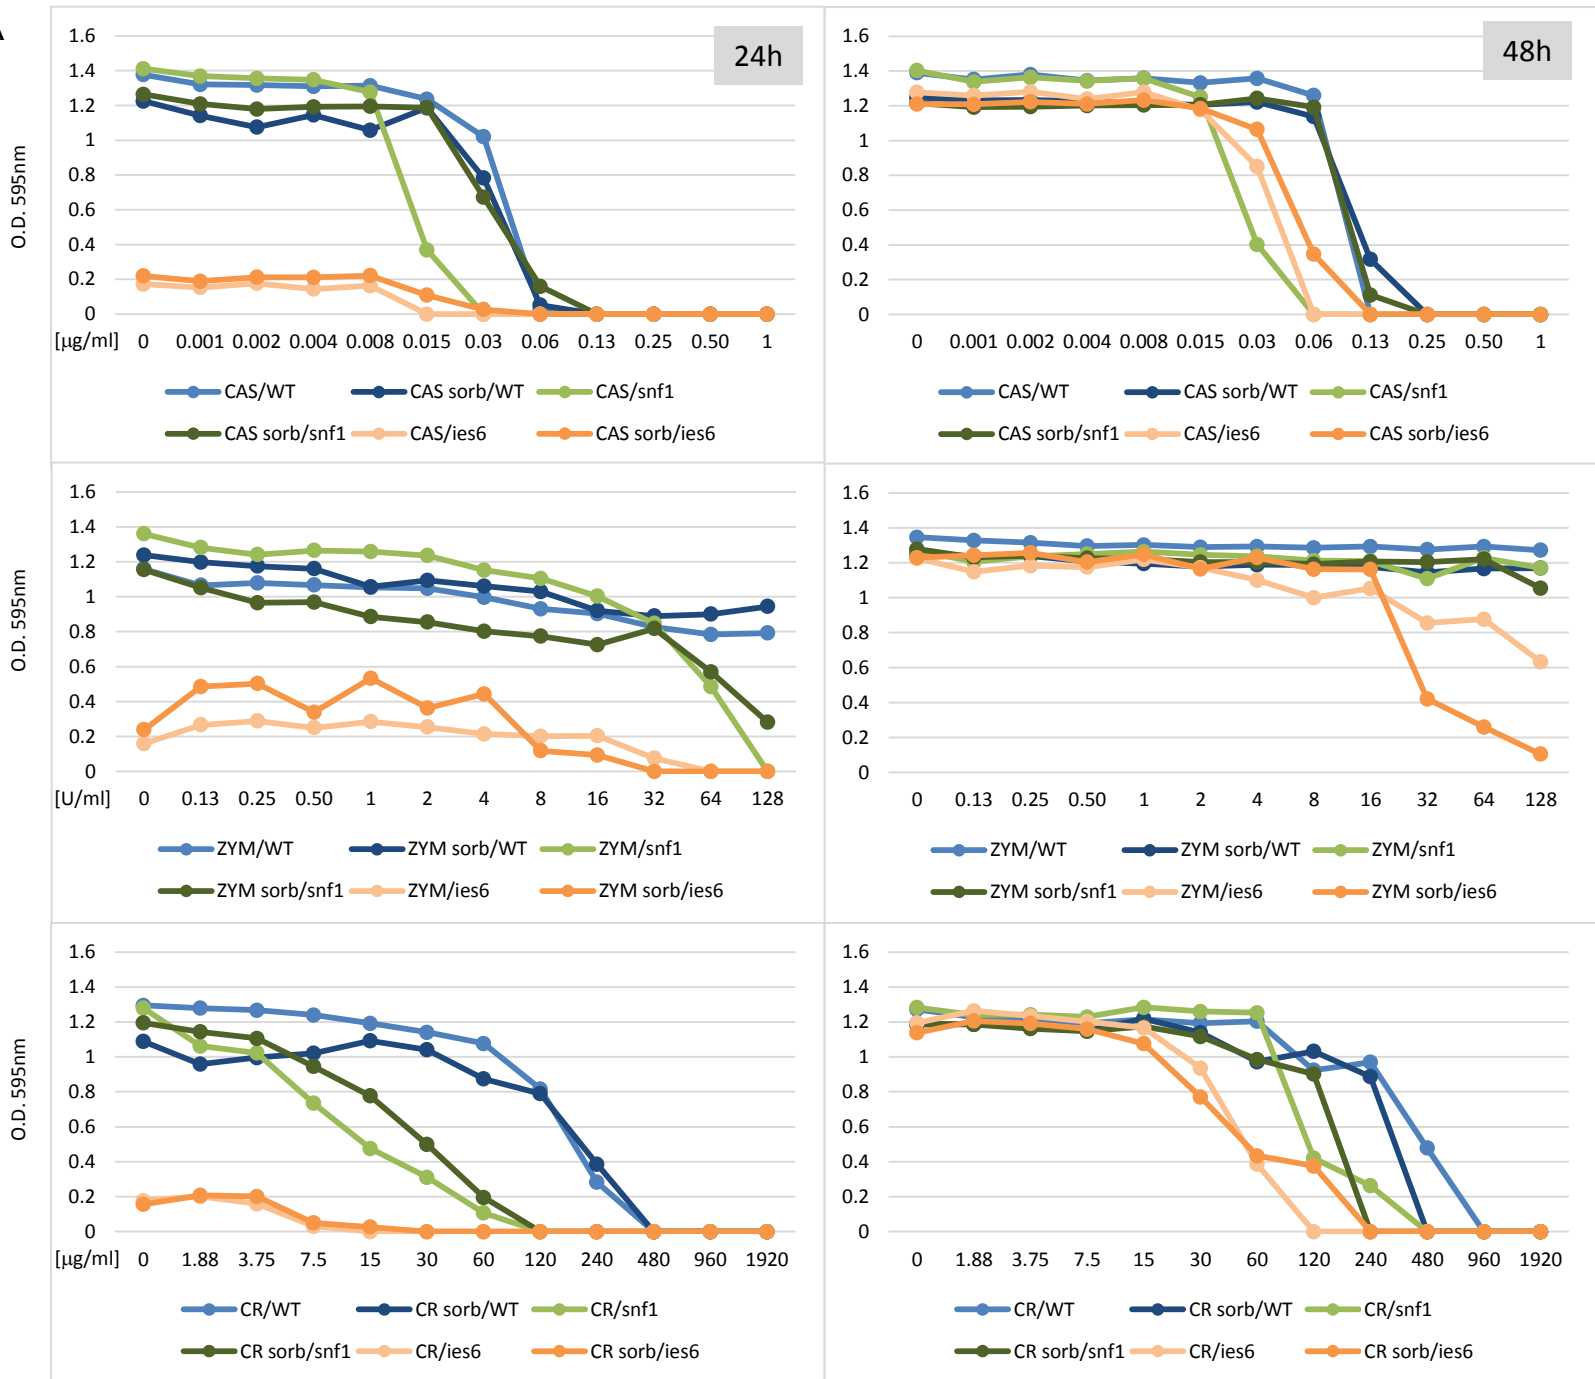

*bud32Δ* and *ypt6Δ*

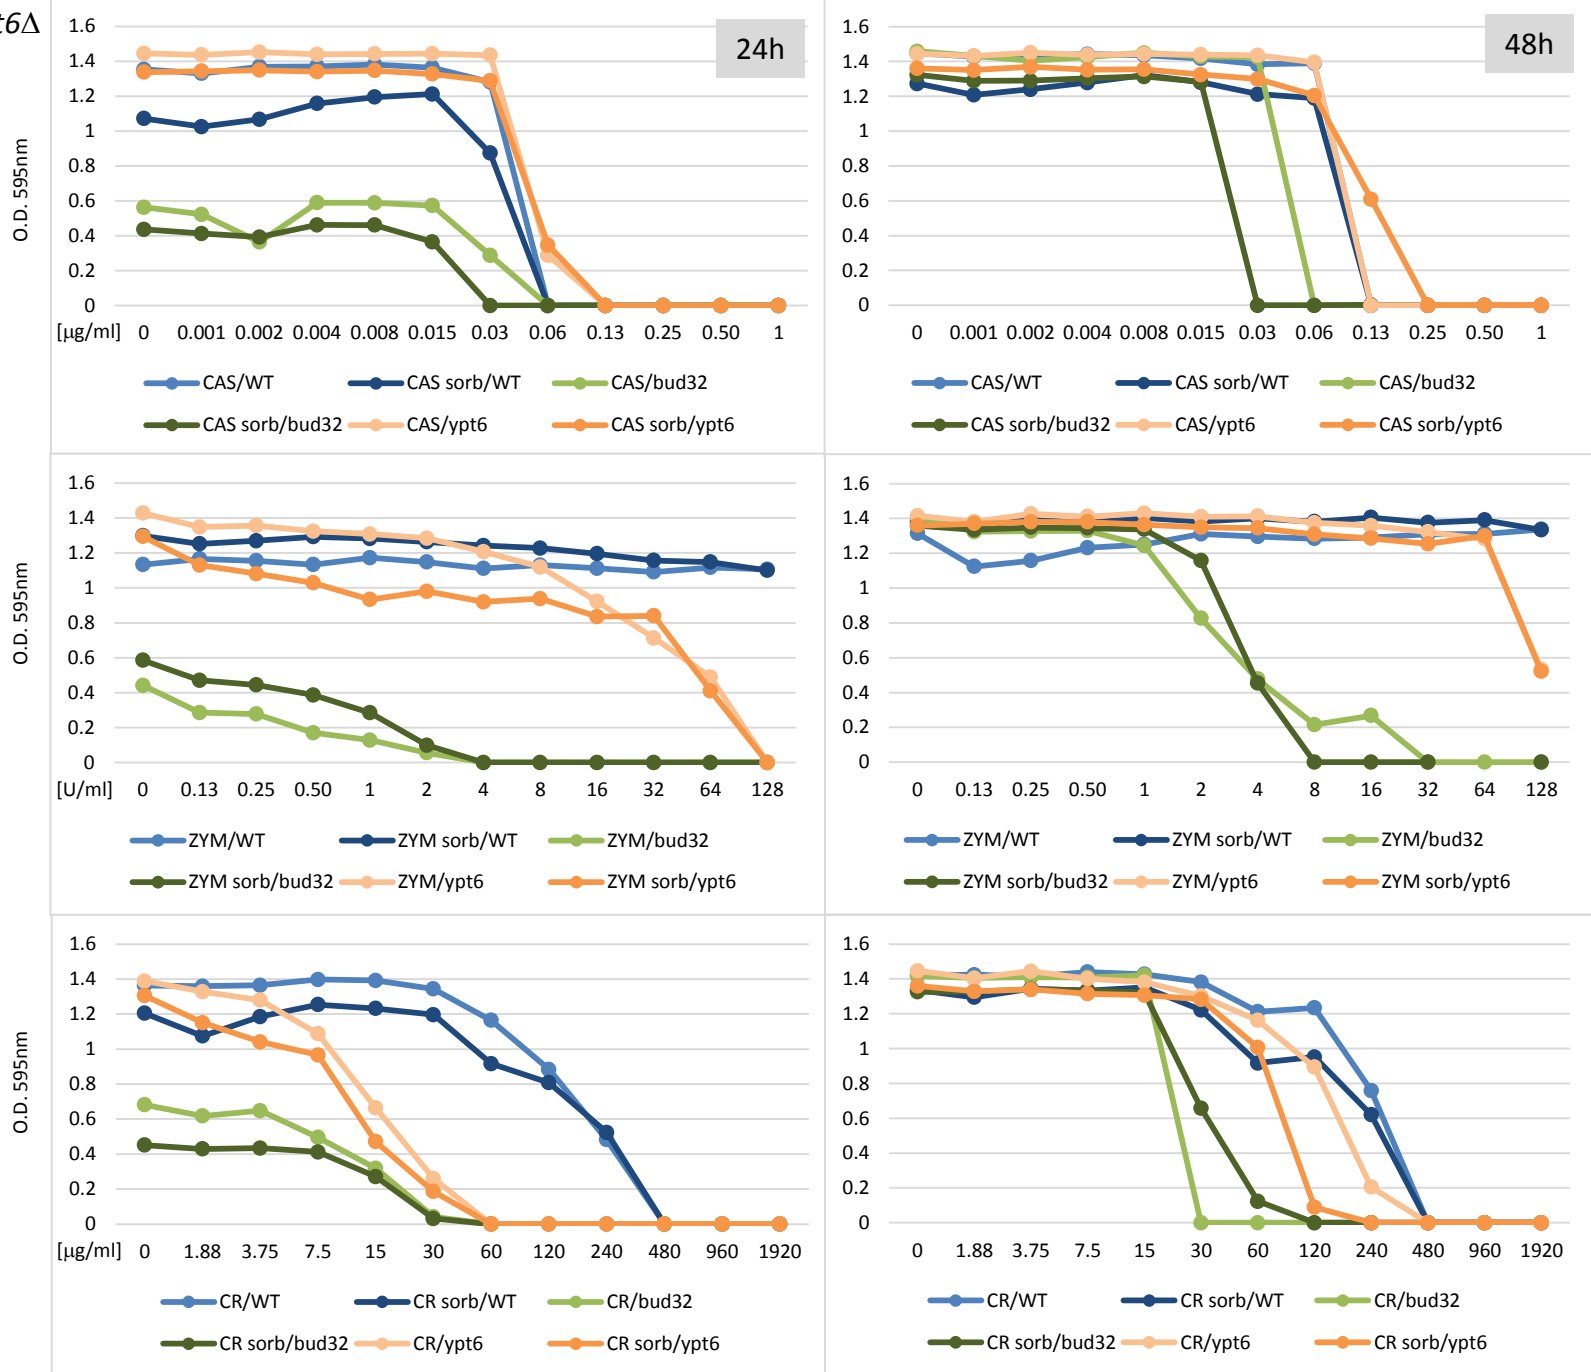

*mnn10*Δ and *akr1*Δ

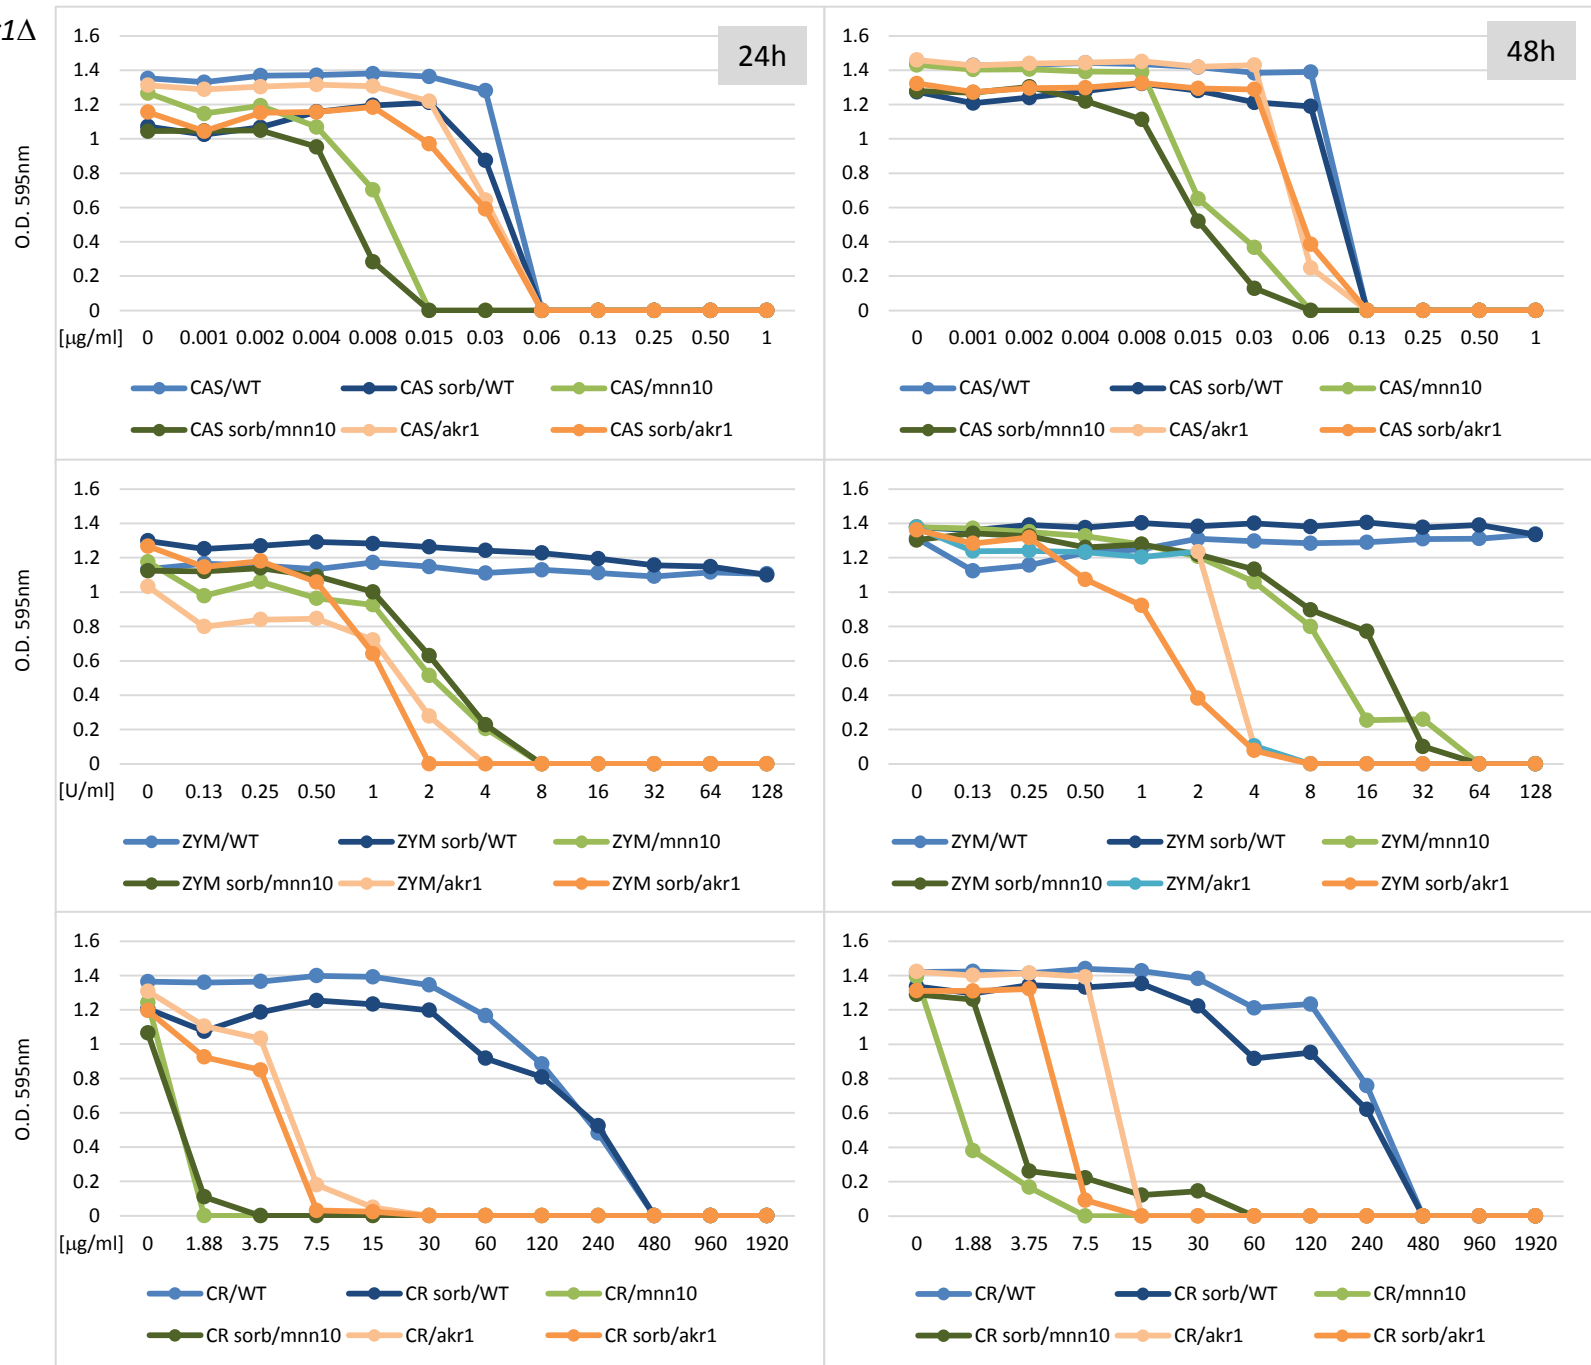

*pct1Δ* and *cdc40Δ*

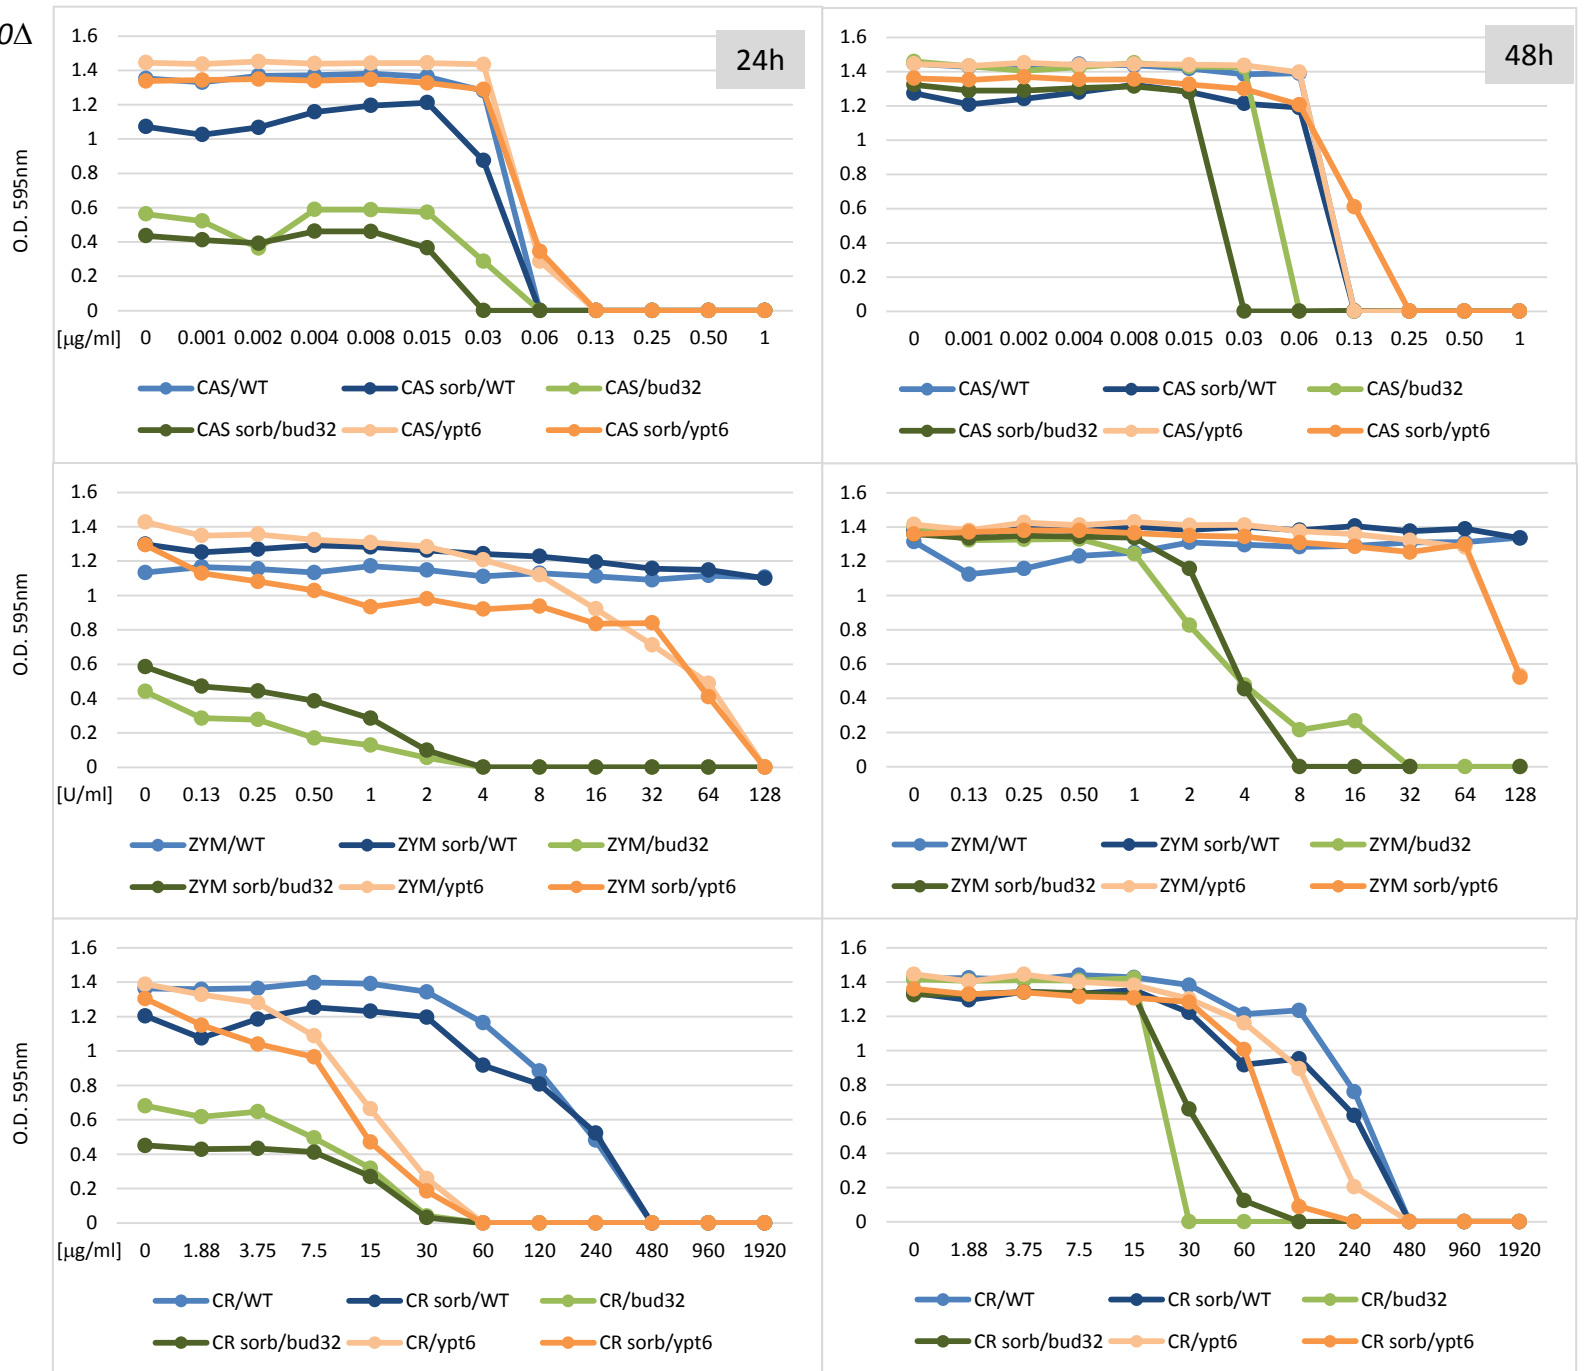

*she4*Δ and *erg6*Δ

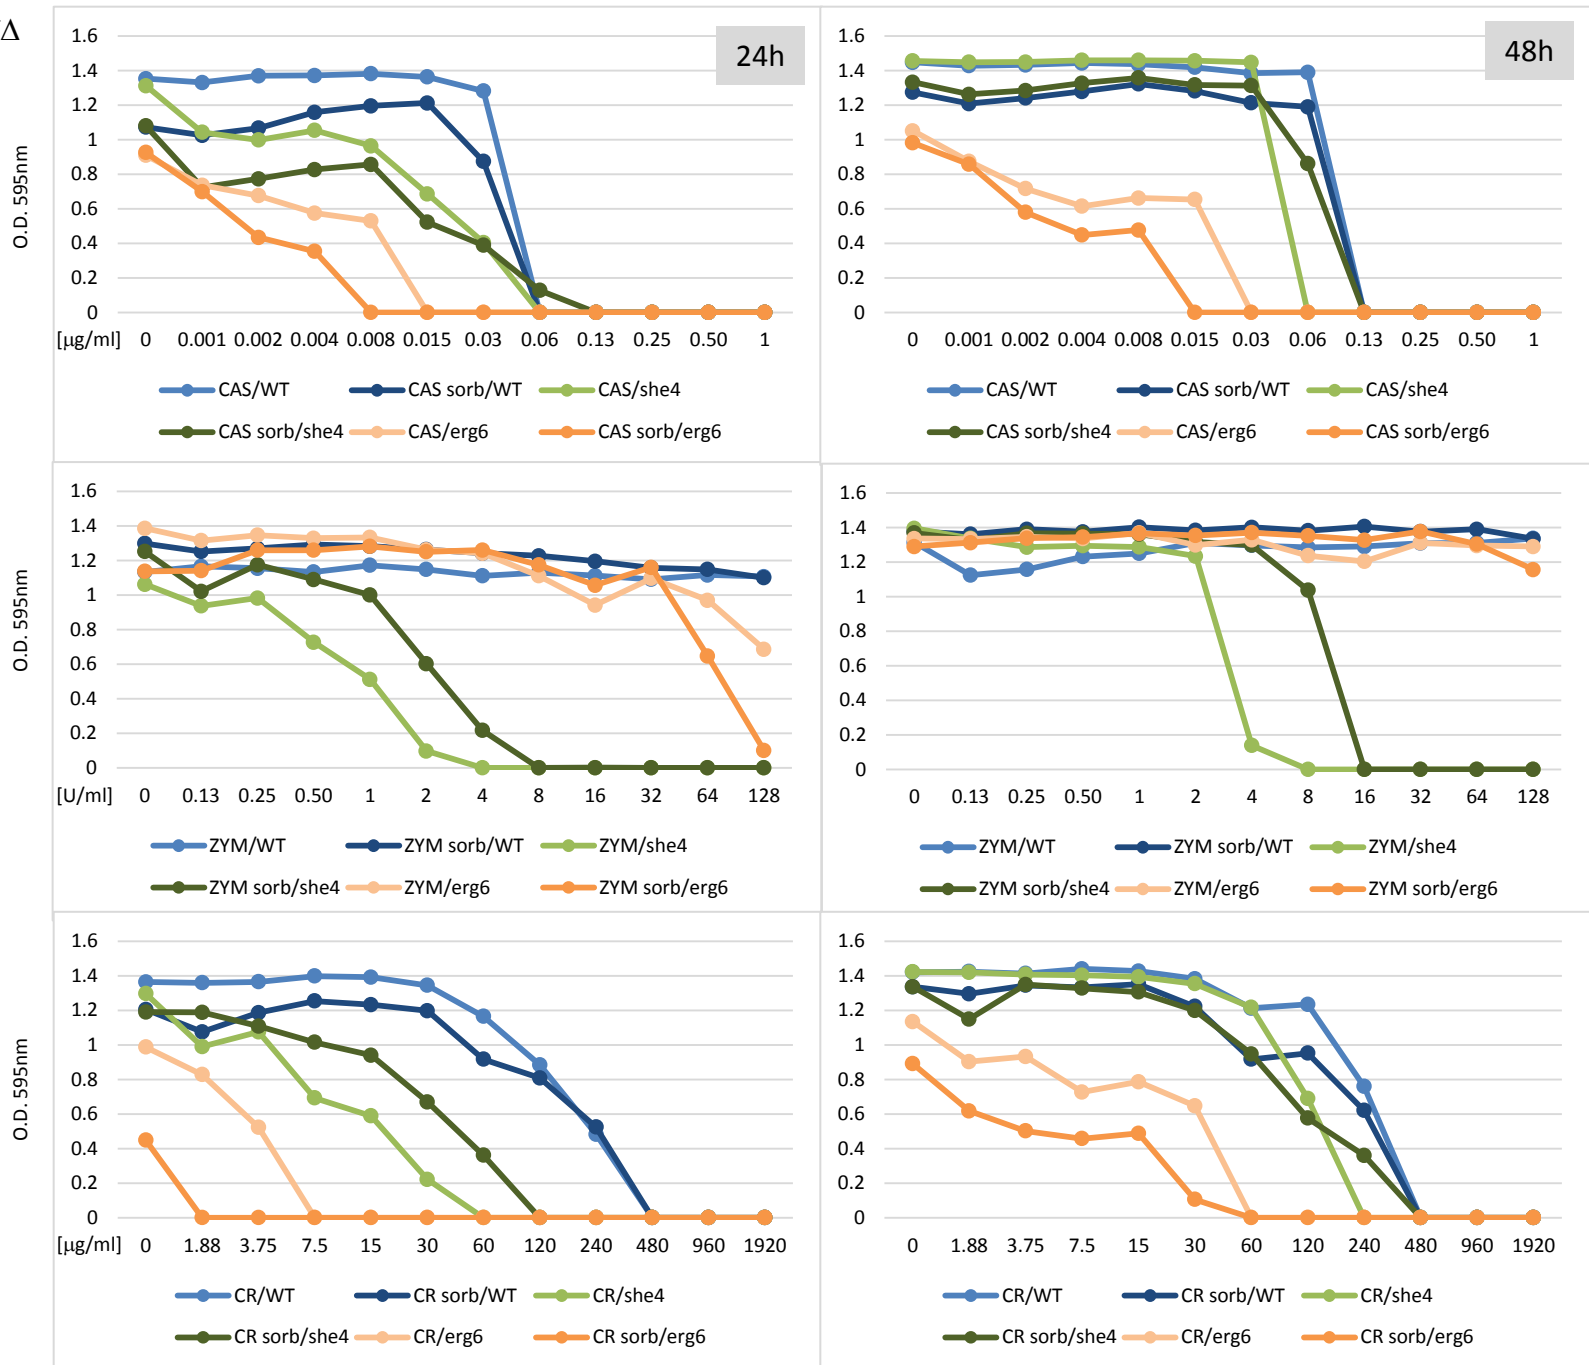



*gas1* $\Delta$  and *end3* $\Delta$

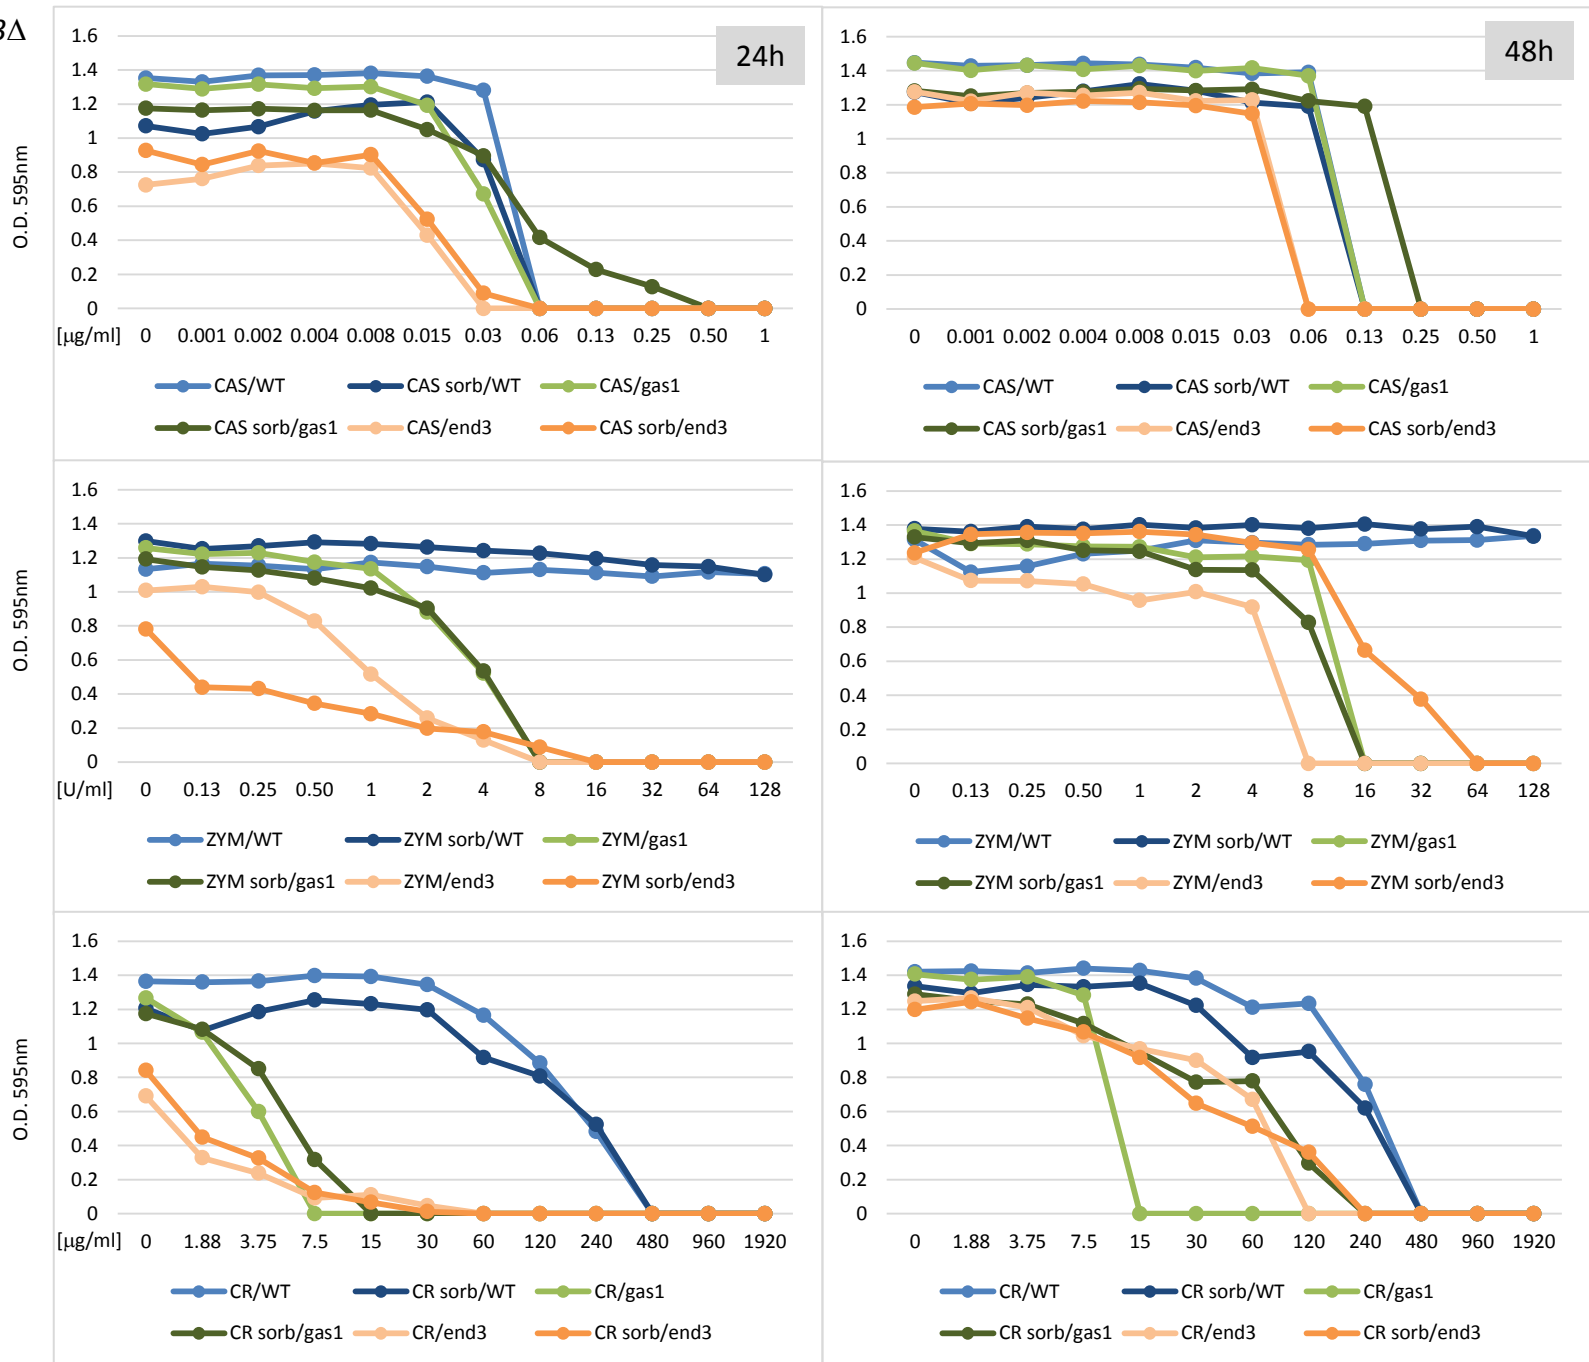

*spt20*Δ and *pmt2*Δ

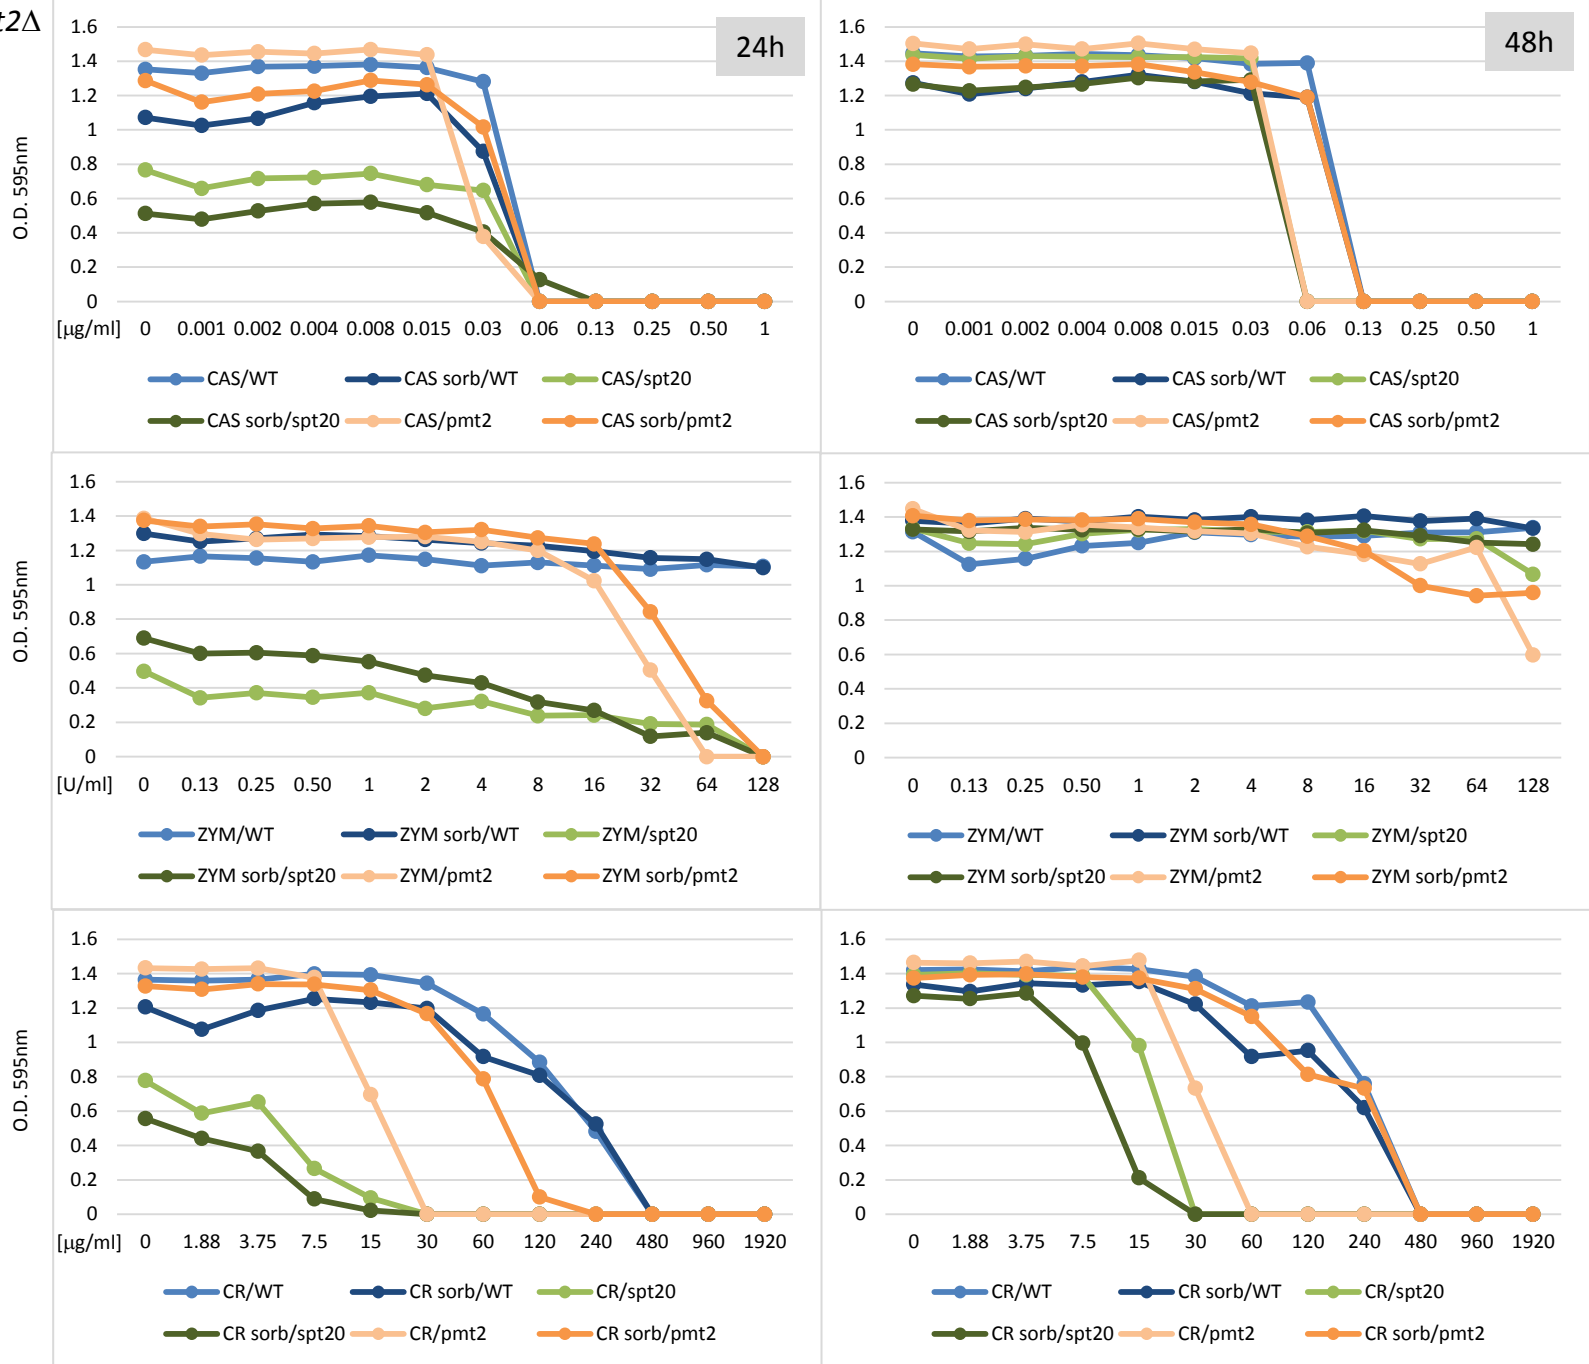

*shp1*Δ and *rox3*Δ

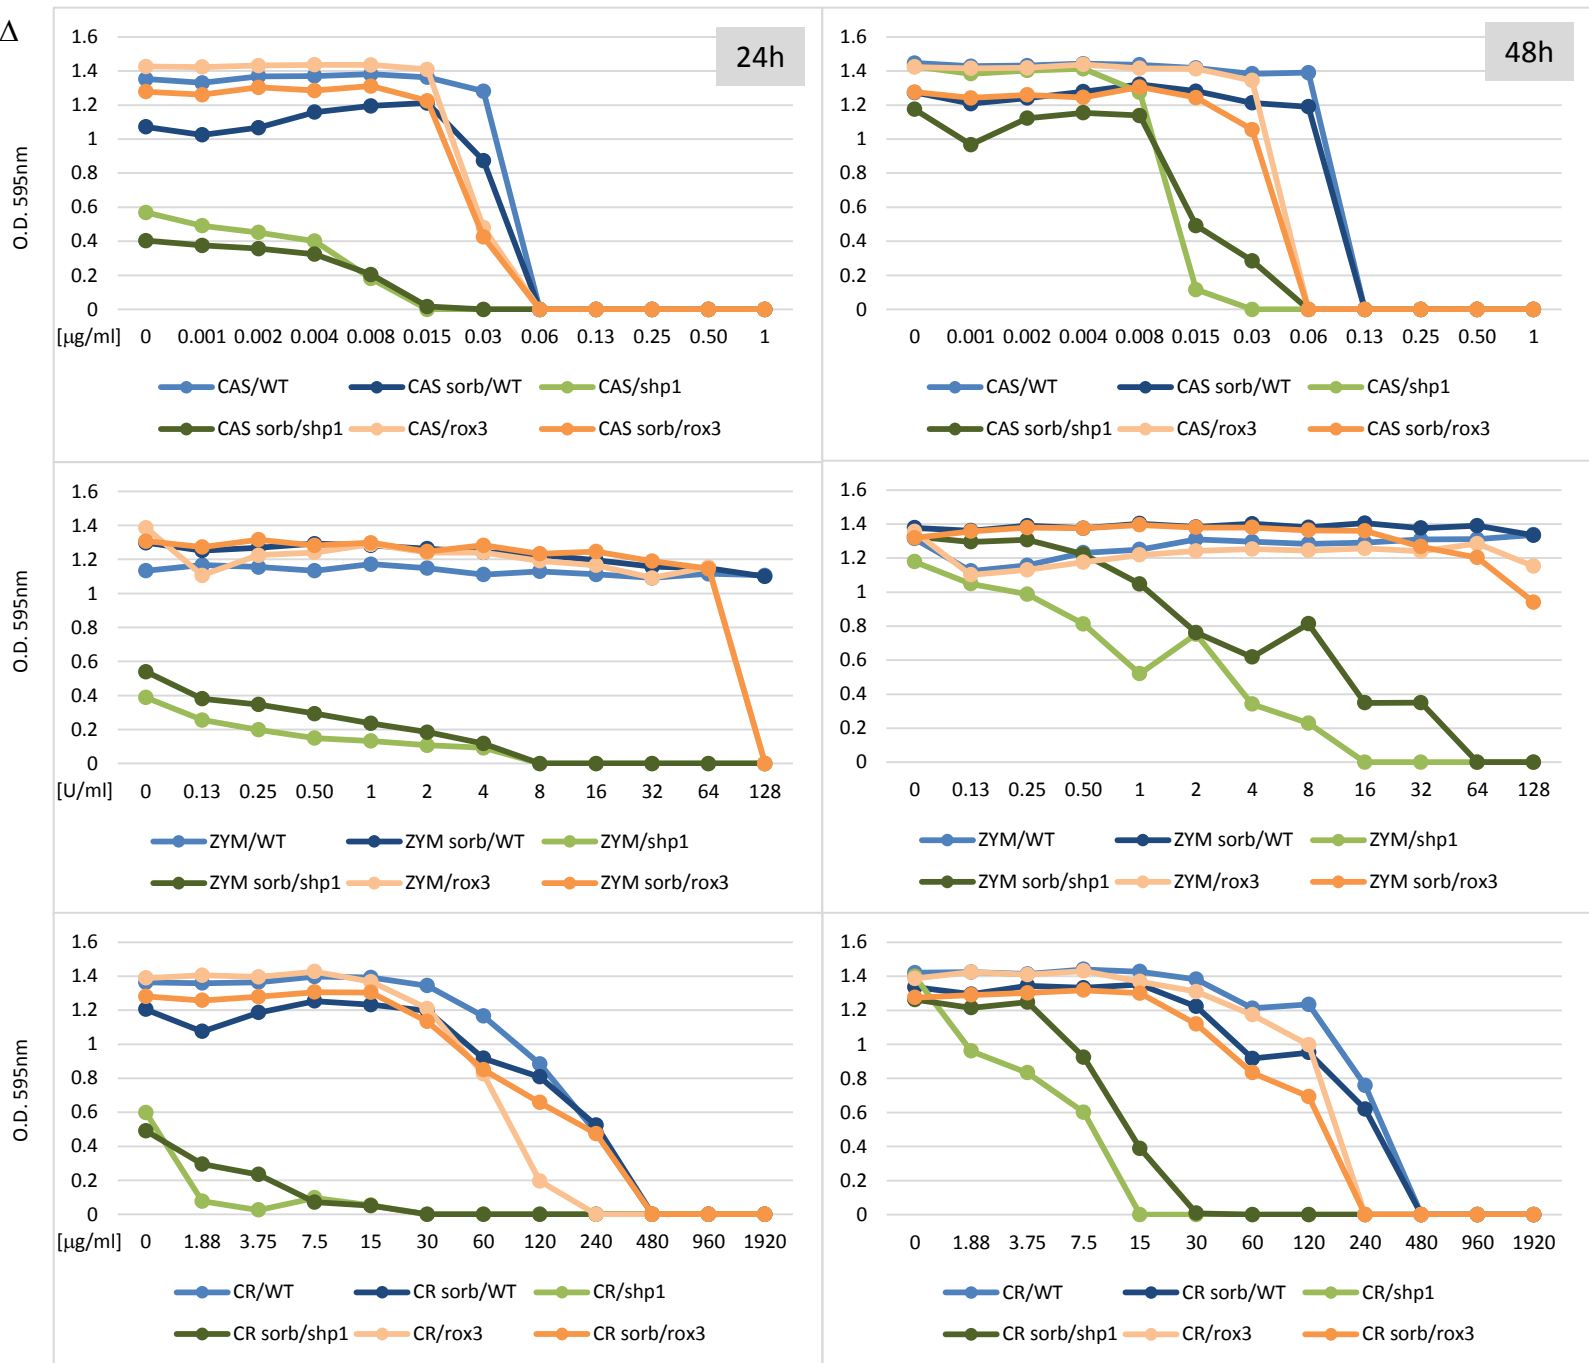

*vma4*Δ and *thp1*Δ

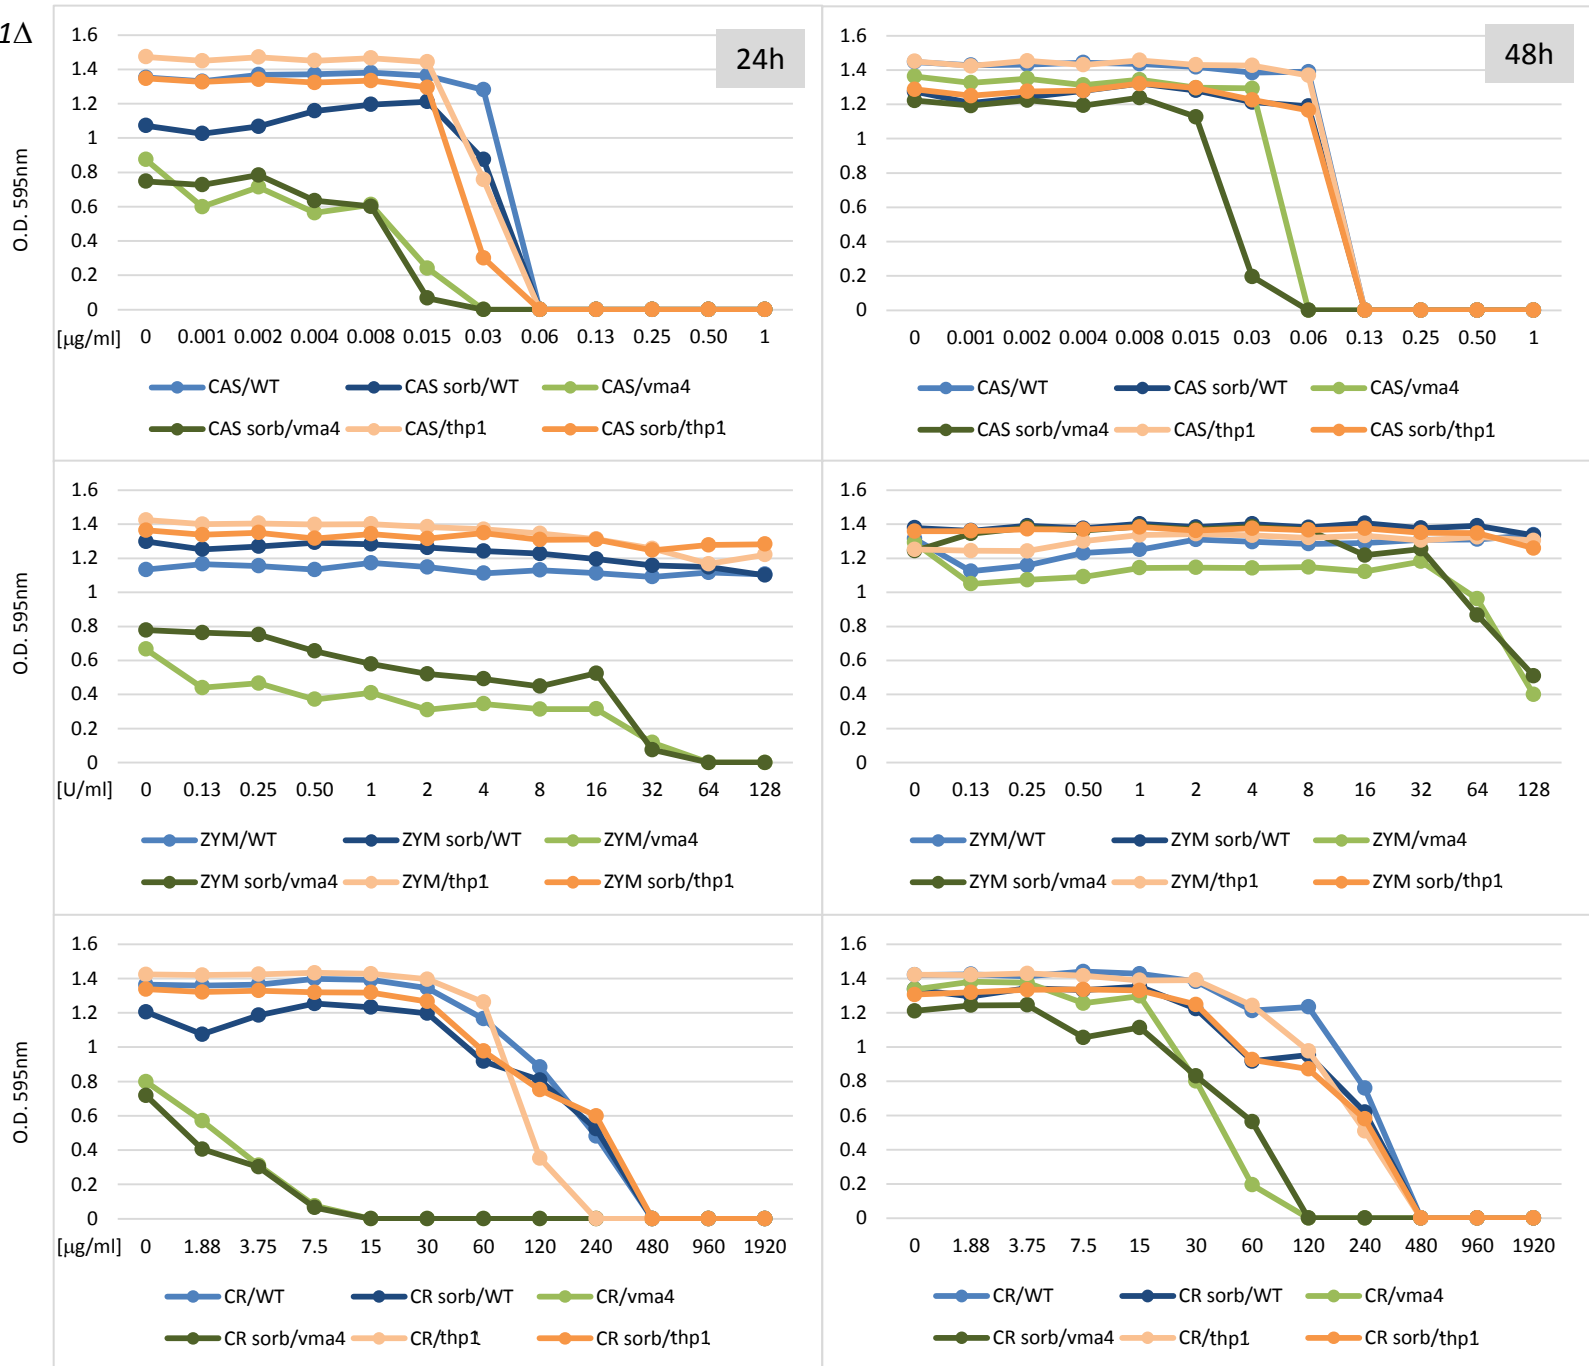

*loa1*Δ and *vma3*Δ

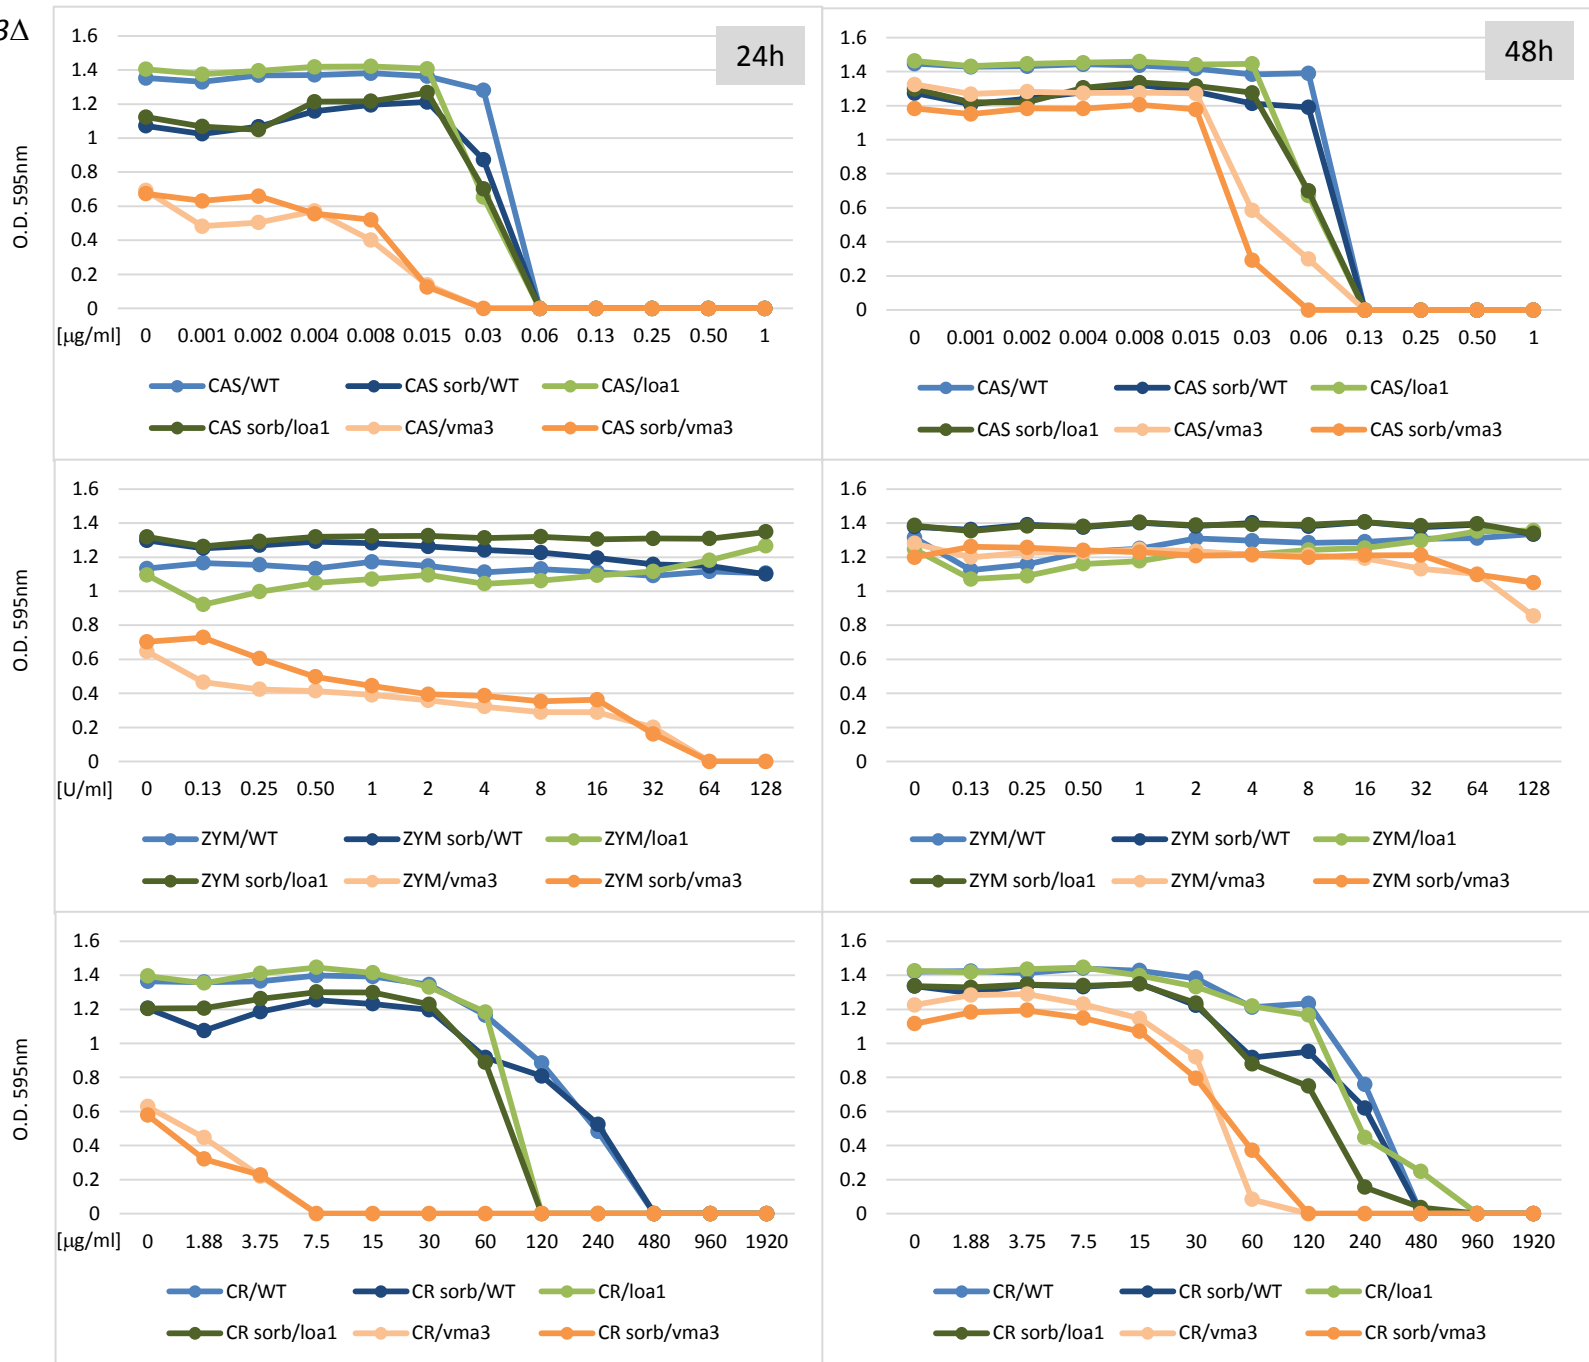

Supplement: 12864_2015_1879_MOESM3_ESM.pdf [file 12864_2015_1879_MOESM3_ESM.pdf]
