# Supplementary material for: Genomic profiling of fungal cell wall-interfering compounds: identification of a common gene signature
Source: PubMed Central journal article supplement (PMC4560923; doi:10.1186/s12864-015-1879-4), 2015-09-05

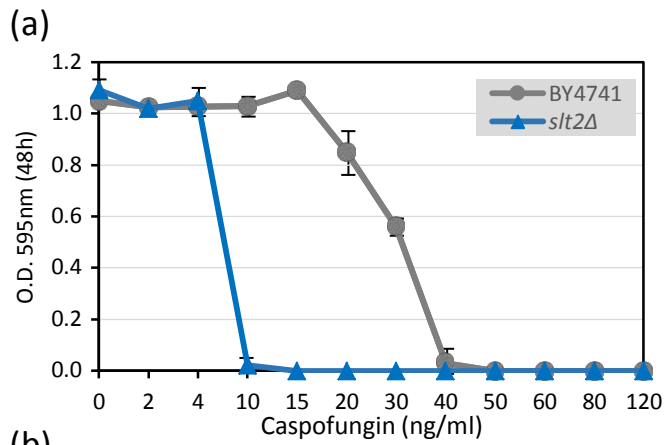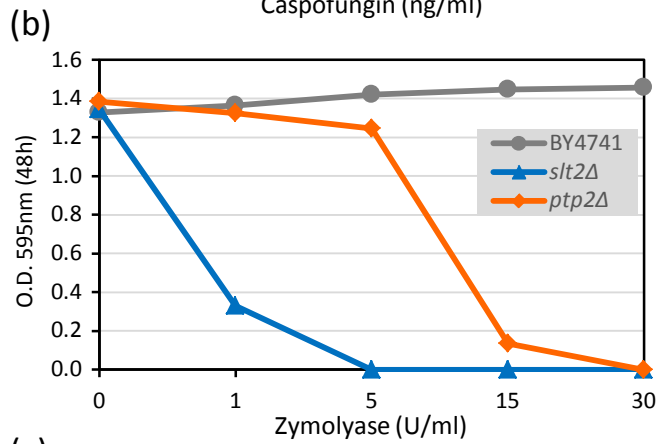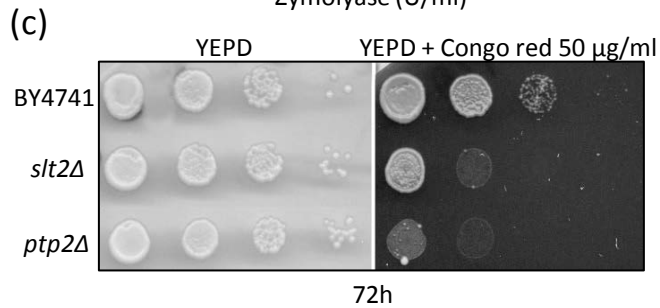

Supplement: 12864_2015_1879_MOESM1_ESM.pdf [file 12864_2015_1879_MOESM1_ESM.pdf]
